# Supplementary material for: Tuning local chemistry of P2 layered-oxide cathode for high energy and long cycles of sodium-ion battery
Source: PubMed Central journal article supplement (PMC8050090; doi:10.1038/s41467-021-22523-3), 2021-04-15
Supplement: 41467_2021_22523_MOESM1_ESM.pdf [file 41467_2021_22523_MOESM1_ESM.pdf]

## **Supplementary Information**

### **Tuning local chemistry of P2 layered-oxide cathode for high energy and long cycles of sodium-ion battery**

Wang et al.

## Supplementary Figures

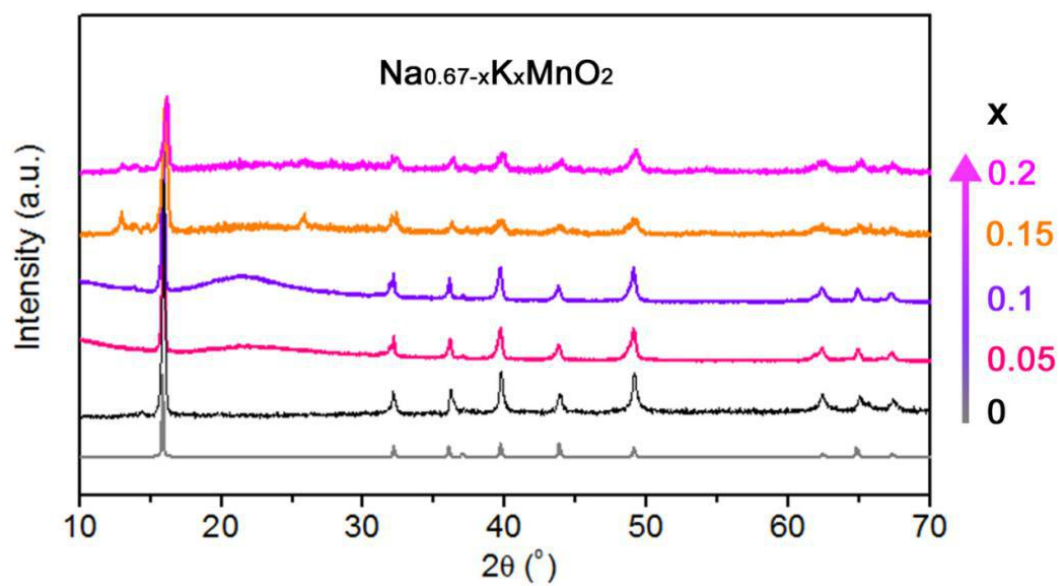

Supplementary Fig. 1 XRD patterns for the as-synthesized  $\text{Na}_{0.67-x}\text{K}_x\text{MnO}_2$  ( $0 \leq x \leq 0.2$ ) using sodium acetate precursor.

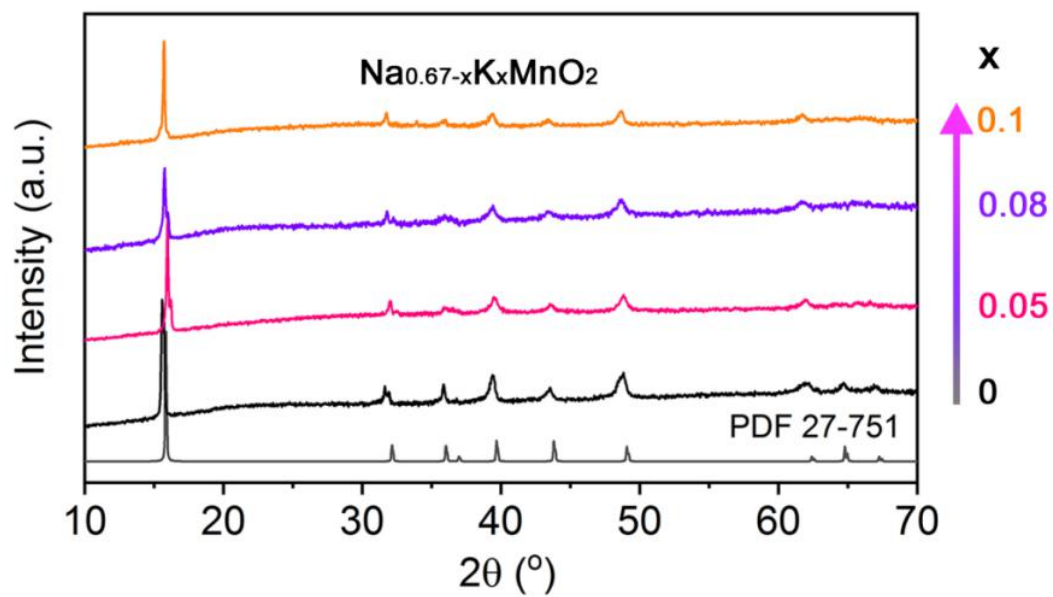

**Supplementary Fig. 2 XRD patterns for the as-synthesized  $\text{Na}_{0.67-x}\text{K}_x\text{MnO}_2$  ( $0 \leq x \leq 0.1$ ) using sodium carbonate precursor.**

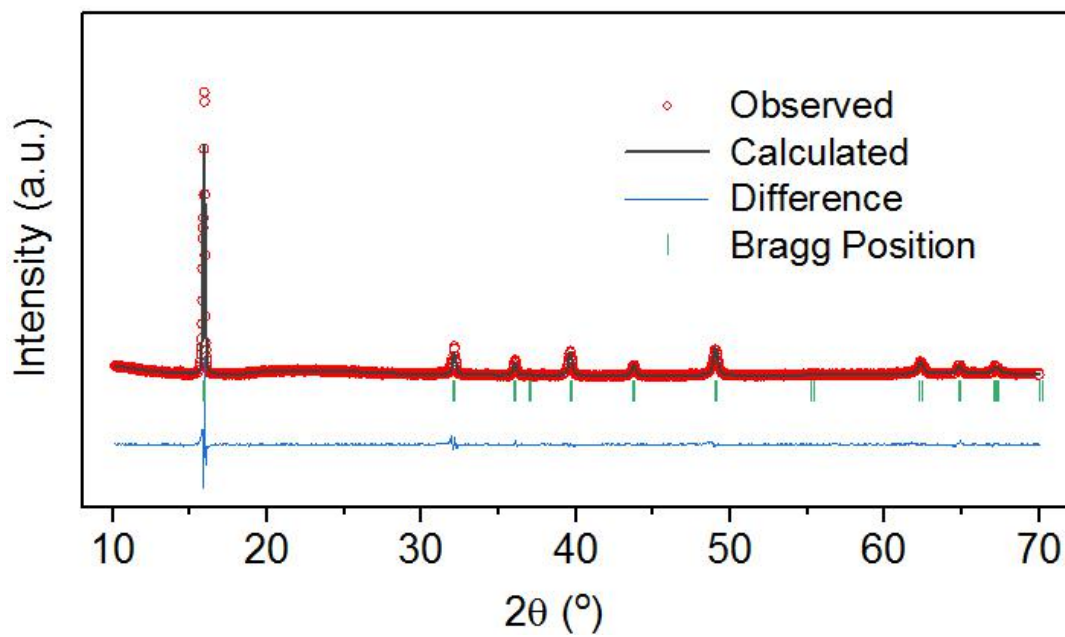

**Supplementary Fig. 3 XRD Rietveld refinement pattern for the as-synthesized  $\text{Na}_{0.706}\text{MnO}_2$ .**

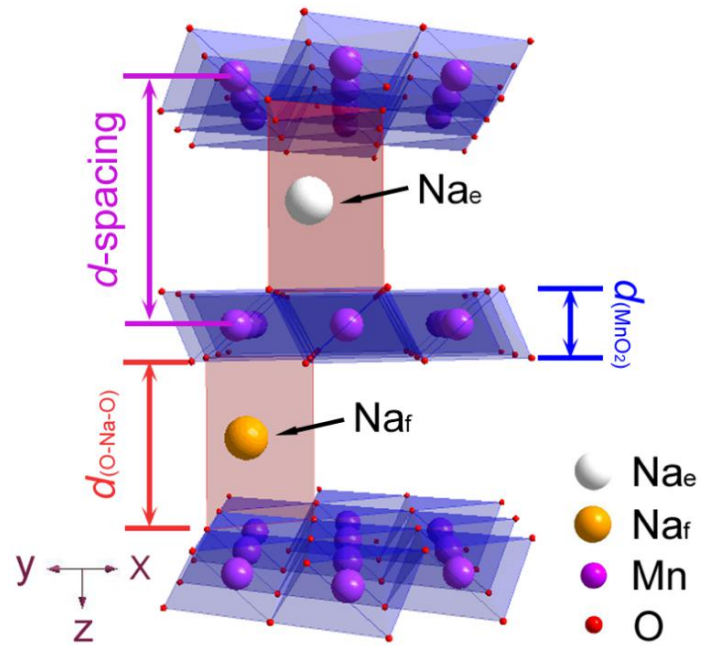

**Supplementary Fig. 4 Structure of  $\text{Na}_{0.706}\text{MnO}_2$  in the  $P6_3/mmc$  space group viewed along the  $y$  axis.** It shows the typical  $\text{Na}_e$  (edge-sharing),  $\text{Na}_f$  (face-sharing) sites,  $d$ -spacing,  $d_{(\text{Na}-\text{O}-\text{Na})}$  and  $d_{\text{MnO}_2}$ .

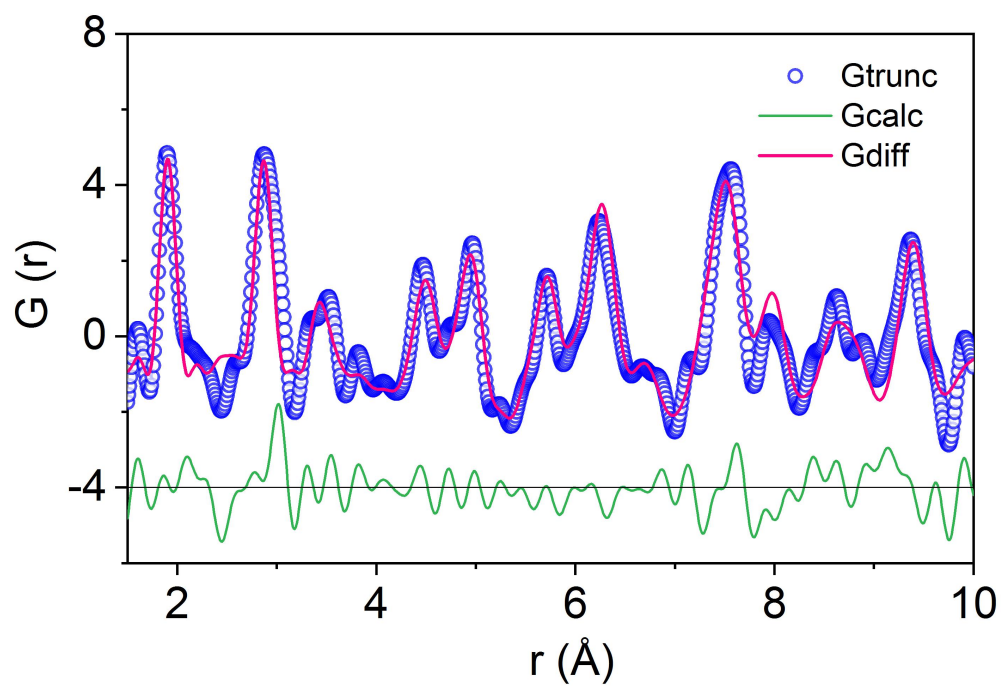

Supplementary Fig. 5 PDF pattern of  $\text{Na}_{0.706}\text{MnO}_2$ .

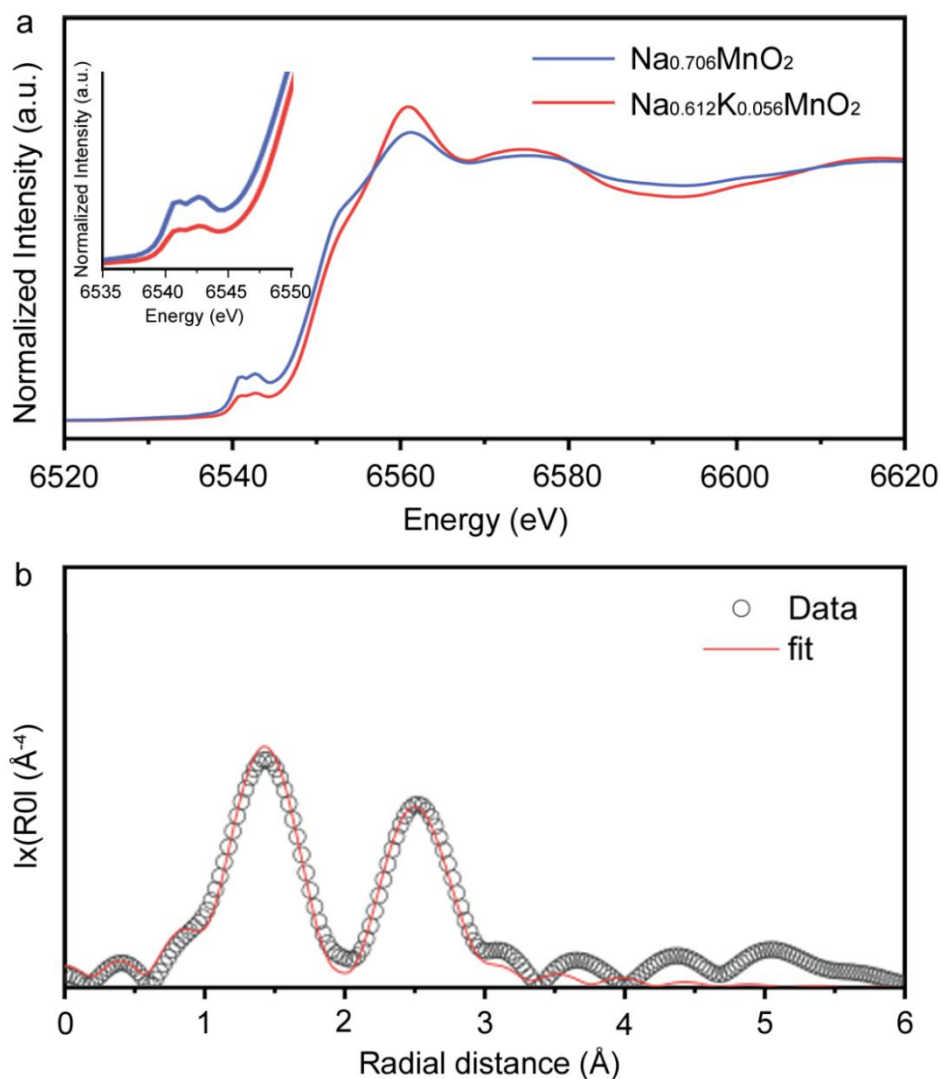

**Supplementary Fig. 6 a**, XANES spectra at the Mn K-edge for  $\text{Na}_{0.612}\text{K}_{0.056}\text{MnO}_2$  and  $\text{Na}_{0.706}\text{MnO}_2$ . **b**, Fitting of Mn K-edge FT-EXAFS spectra of  $\text{Na}_{0.706}\text{MnO}_2$ . The magnified pre-edge region is shown in Supplementary figure 6a inset. In the pre-edge region, two peaks are observable, and these Mn pre-edge peaks look similar for both  $\text{Na}_{0.612}\text{K}_{0.056}\text{MnO}_2$  and  $\text{Na}_{0.706}\text{MnO}_2$ , which implies that Mn has the approximately same average oxidation states.

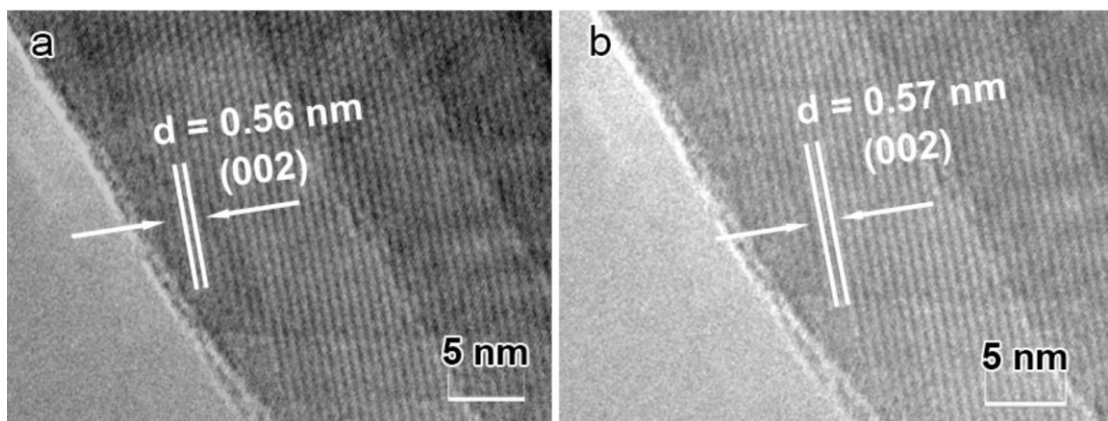

**Supplementary Fig. 7 HRTEM images for the as-synthesized  $\text{Na}_{0.612}\text{K}_{0.056}\text{MnO}_2$  (a) and  $\text{Na}_{0.706}\text{MnO}_2$  (b).**



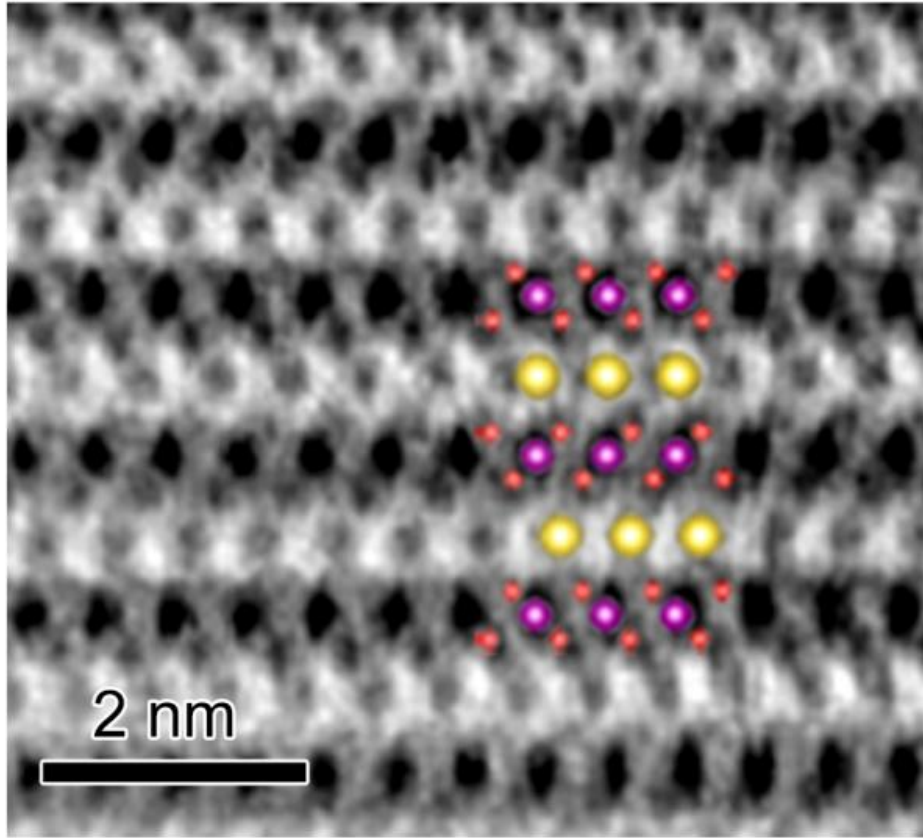

Supplementary Fig. 8 STEM-ABF image for the as-synthesized  $\text{Na}_{0.602}\text{K}_{0.056}\text{MnO}_2$ .

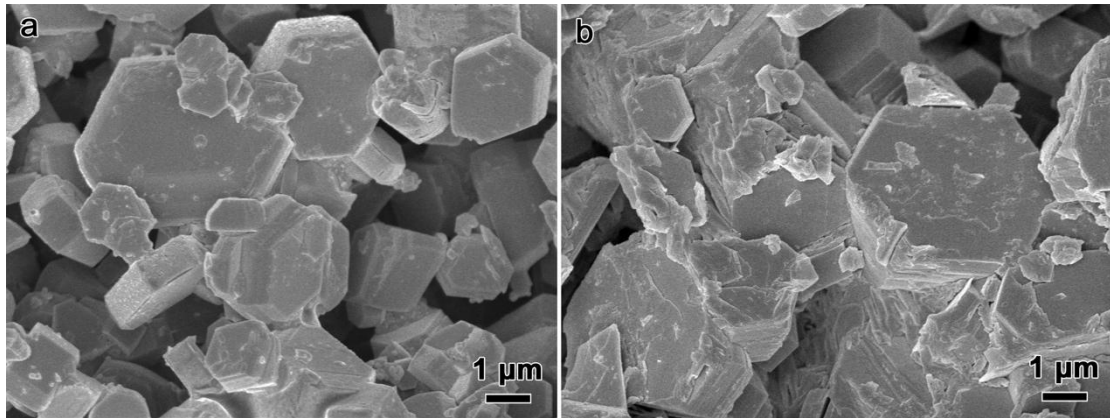

**Supplementary Fig. 9 SEM images for the as-synthesized  $\text{Na}_{0.612}\text{K}_{0.056}\text{MnO}_2$  (a) and  $\text{Na}_{0.706}\text{MnO}_2$  (b).**

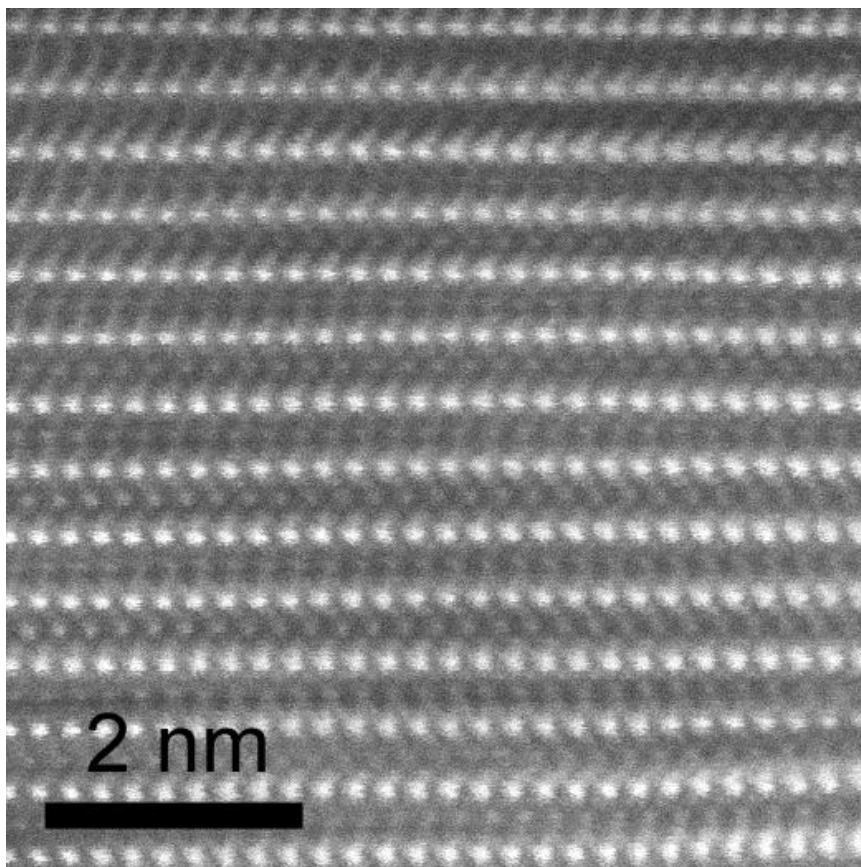

Supplementary Fig. 10 STEM-HAADF image for the as-synthesized Na<sub>0.706</sub>MnO<sub>2</sub>.

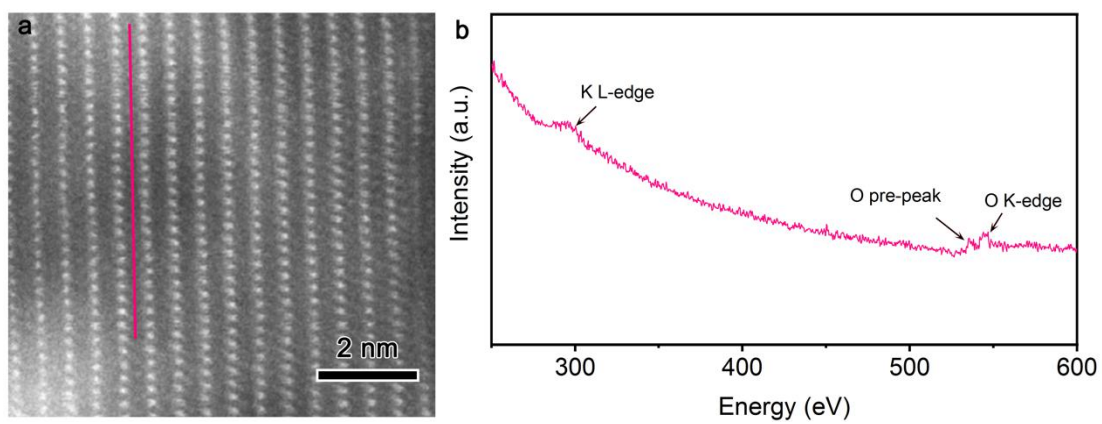

**Supplementary Fig. 11 a, STEM-HAADF image of the as-synthesized  $\text{Na}_{0.612}\text{K}_{0.056}\text{MnO}_2$  (b) and EELS profile scanned along the pink line in (a).**

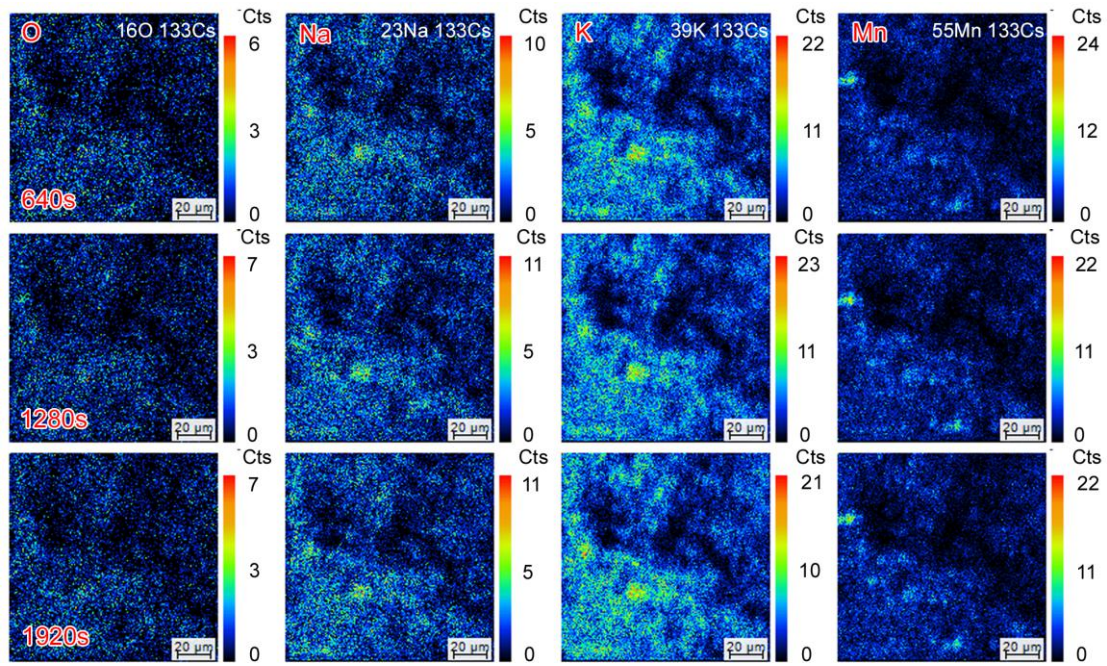

Supplementary Fig. 12 Elemental secondary ion mass spectrometry (SIMS) mapping of the pristine  $\text{Na}_{0.612}\text{K}_{0.056}\text{MnO}_2$ .

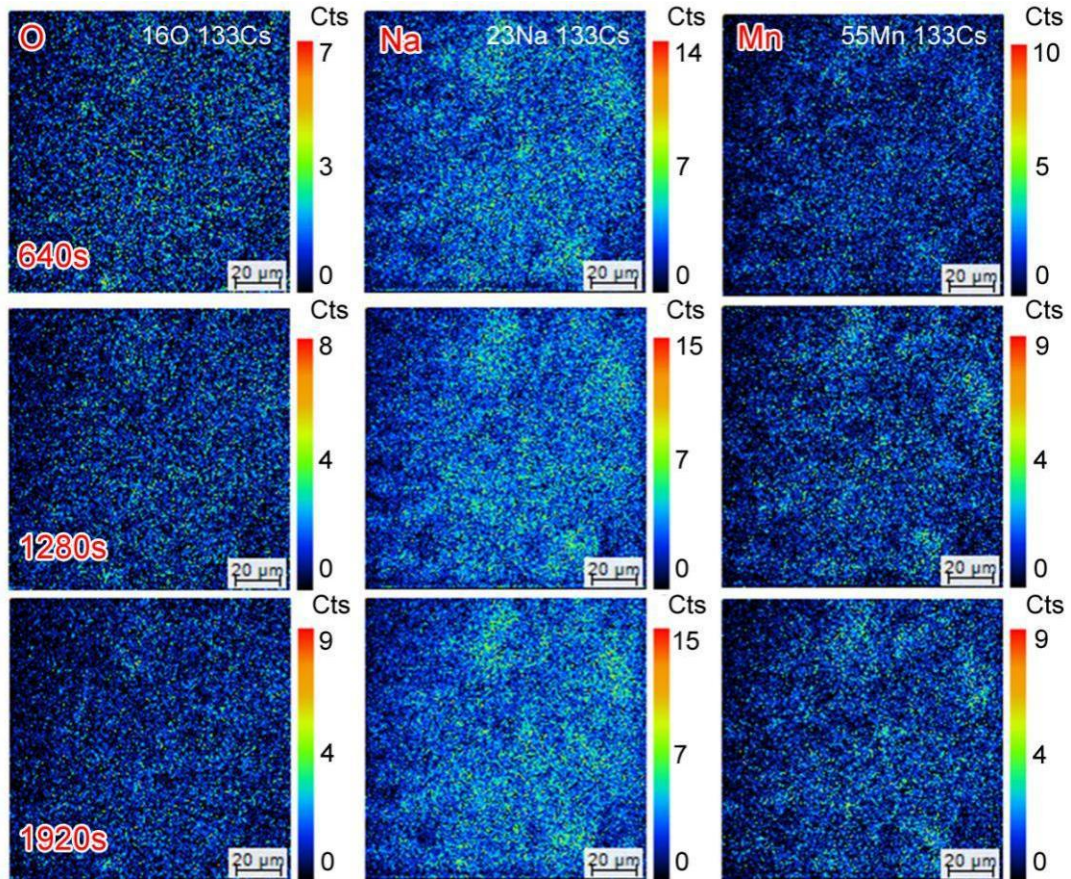

Supplementary Fig. 13 Elemental secondary ion mass spectrometry (SIMS) mapping of the pristine  $\text{Na}_{0.706}\text{MnO}_2$ .

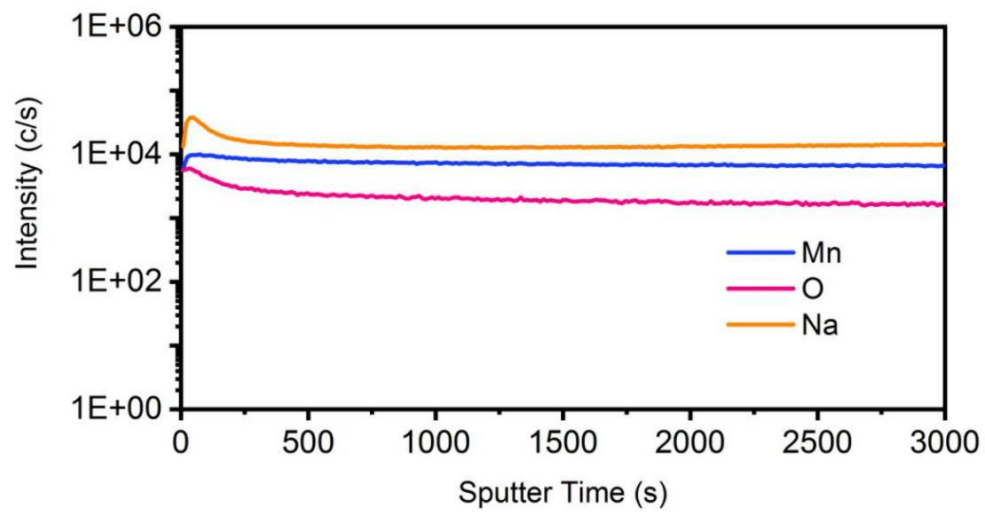

**Supplementary Fig. 14 Sputter depth profiles of Na<sub>0.706</sub>MnO<sub>2</sub>.**

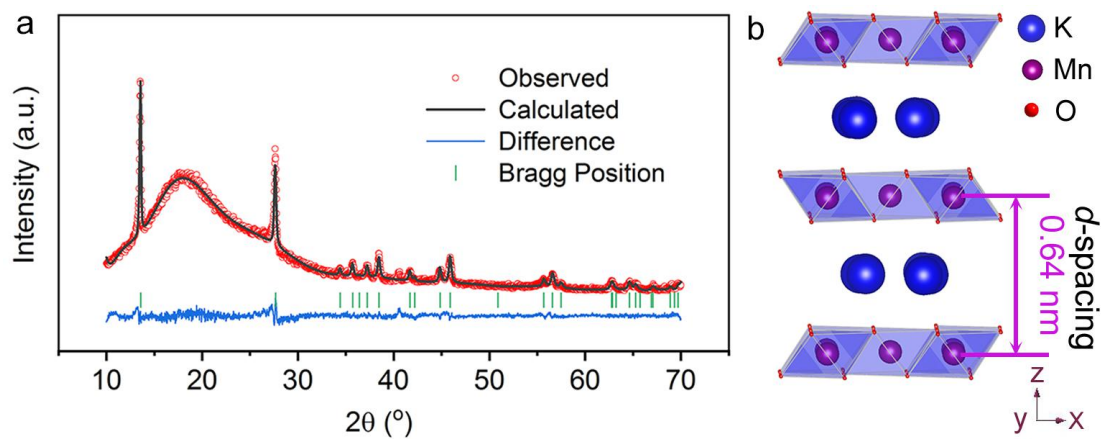

**Supplementary Fig. 15 a, XRD Rietveld refinement pattern for  $K_{0.67}MnO_2$ . b, Structure of layered  $K_{0.67}MnO_2$  in the  $ccmm$  space group.**



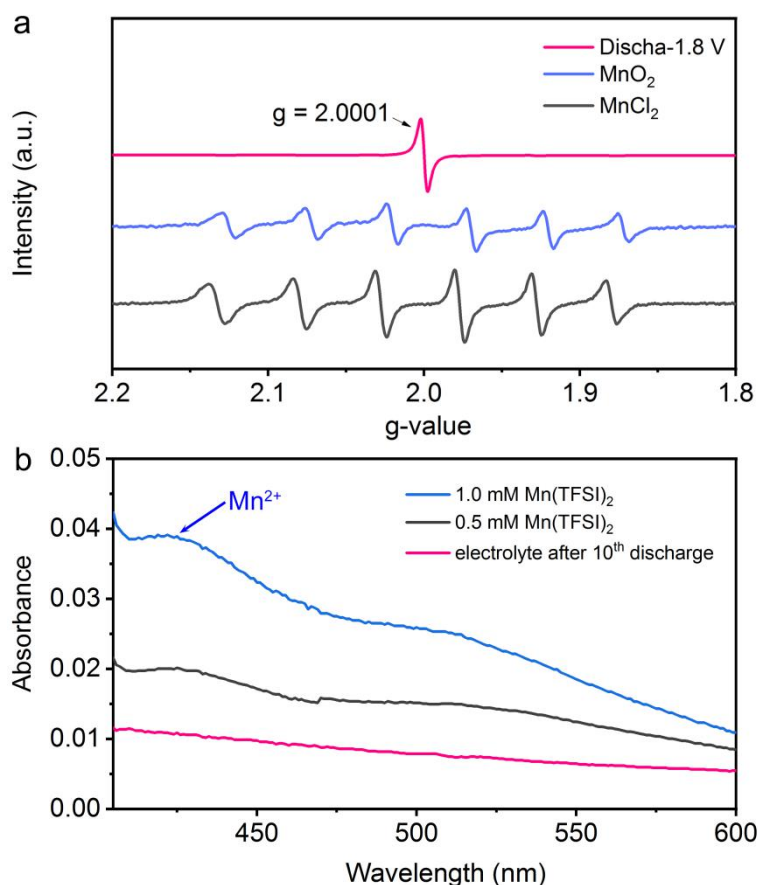

**Supplementary Fig. 16 a, Electron paramagnetic resonance (EPR) spectra of discharged electrodes of P2-Na<sub>1.015</sub>K<sub>0.056</sub>MnO<sub>2</sub>. b, Ultraviolet (UV) spectrum of electrolytes after 10<sup>th</sup> discharge of P2-Na<sub>0.612</sub>K<sub>0.056</sub>MnO<sub>2</sub> as well as 0.5 and 1.0 mM Mn(TFSI)<sub>2</sub>. It was further confirmed that only Mn<sup>3+</sup> exists in the full discharge state without Mn<sup>2+</sup>. The EPR signal observed at  $g=2.0001$  in Na<sub>1.015</sub>K<sub>0.056</sub>MnO<sub>2</sub> is attributed to the oxygen vacancies in the material surface.**

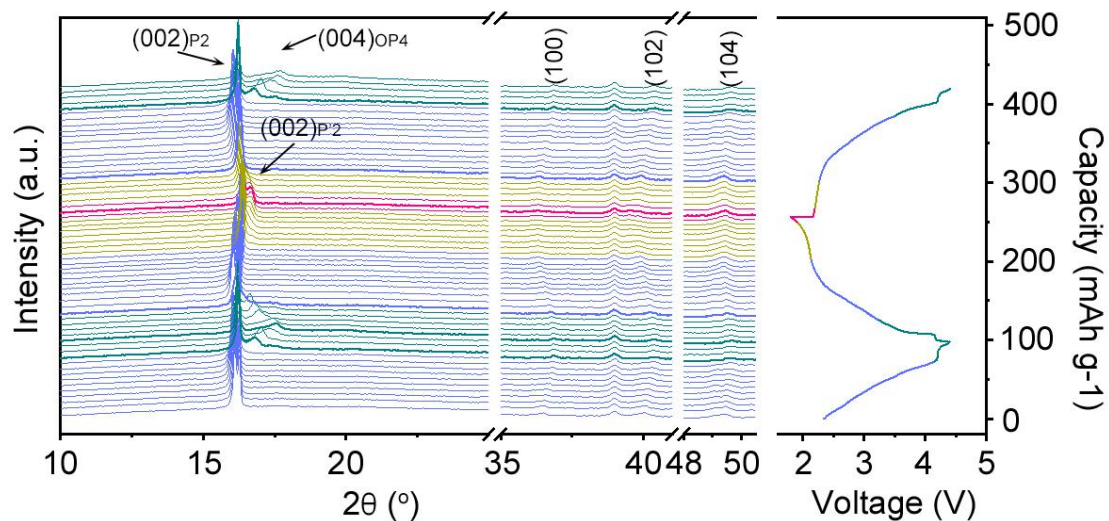

**Supplementary Fig. 17** *In situ* XRD patterns collected during the first charge/discharge and the second charge of the  $\text{Na}_{0.706}\text{MnO}_2$  electrodes. The (004) peak of OP4 phase appears at  $17.5^\circ$ , and the (002) peak of P'2 phase appears at  $17.0^\circ$ . It suggests that P2- $\text{Na}_{0.706}\text{MnO}_2$  involves the phase transition of  $\text{P2} \rightarrow \text{OP4}$  at high charge voltages during charge and  $\text{P2} \rightarrow \text{P}'2$  during discharge.

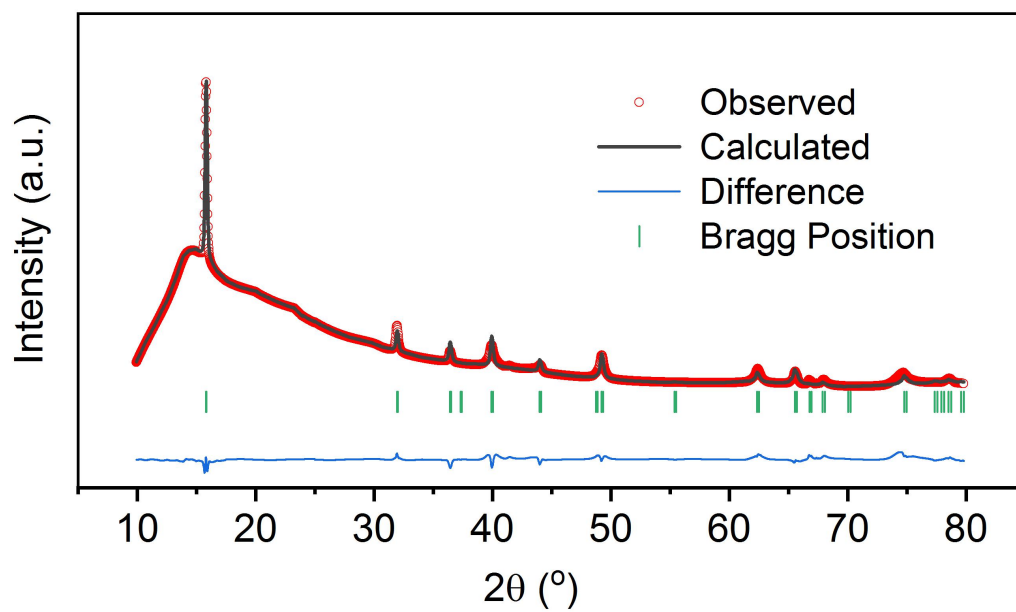

Supplementary Fig. 18 XRD Rietveld refinement pattern of  $\text{Na}_{0.114}\text{K}_{0.056}\text{MnO}_2$ .

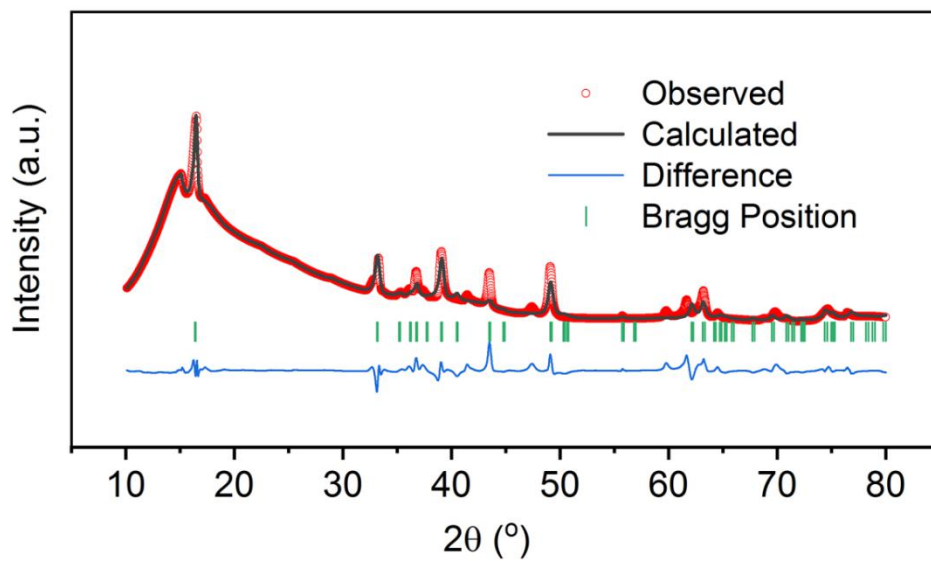

Supplementary Fig. 19 XRD Rietveld refinement pattern of  $\text{Na}_{1.015}\text{K}_{0.056}\text{MnO}_2$ .

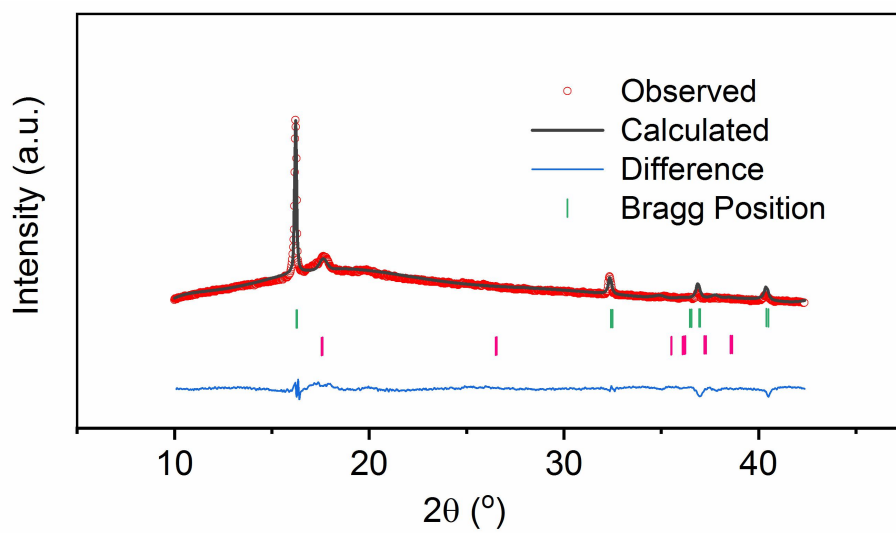

Supplementary Fig. 20 XRD Rietveld refinement pattern of  $\text{Na}_{0.327}\text{MnO}_2$ .

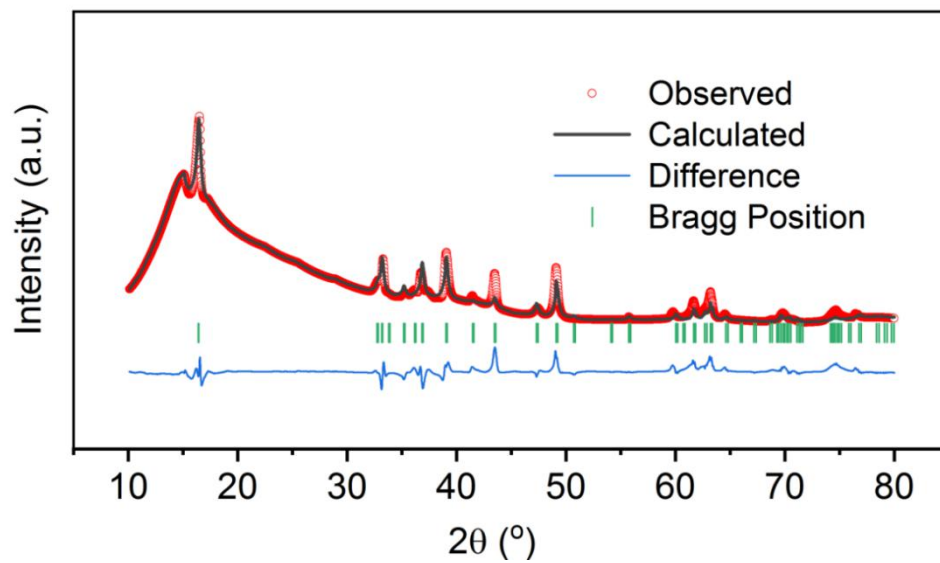

**Supplementary Fig. 21 XRD Rietveld refinement pattern of  $\text{Na}_{0.998}\text{MnO}_2$ .**

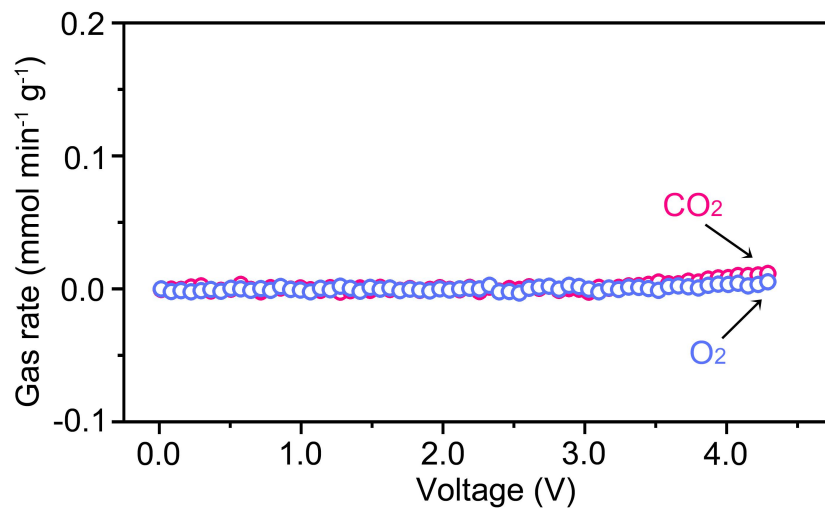

**Supplementary Fig. 22** *In situ* differential electrochemical mass spectrometry (DEMS) results of gas evolution rates of CO<sub>2</sub> and O<sub>2</sub> (unit: mmol min<sup>-1</sup> g<sup>-1</sup>).

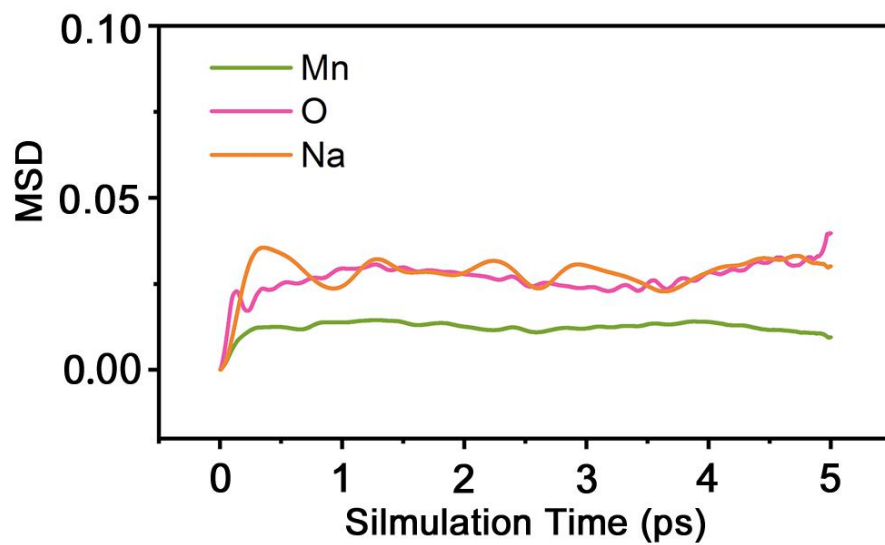

Supplementary Fig. 23 MSD of Mn, Na, and O as functions of time in  $\text{Na}_{0.555}\text{MnO}_2$ .



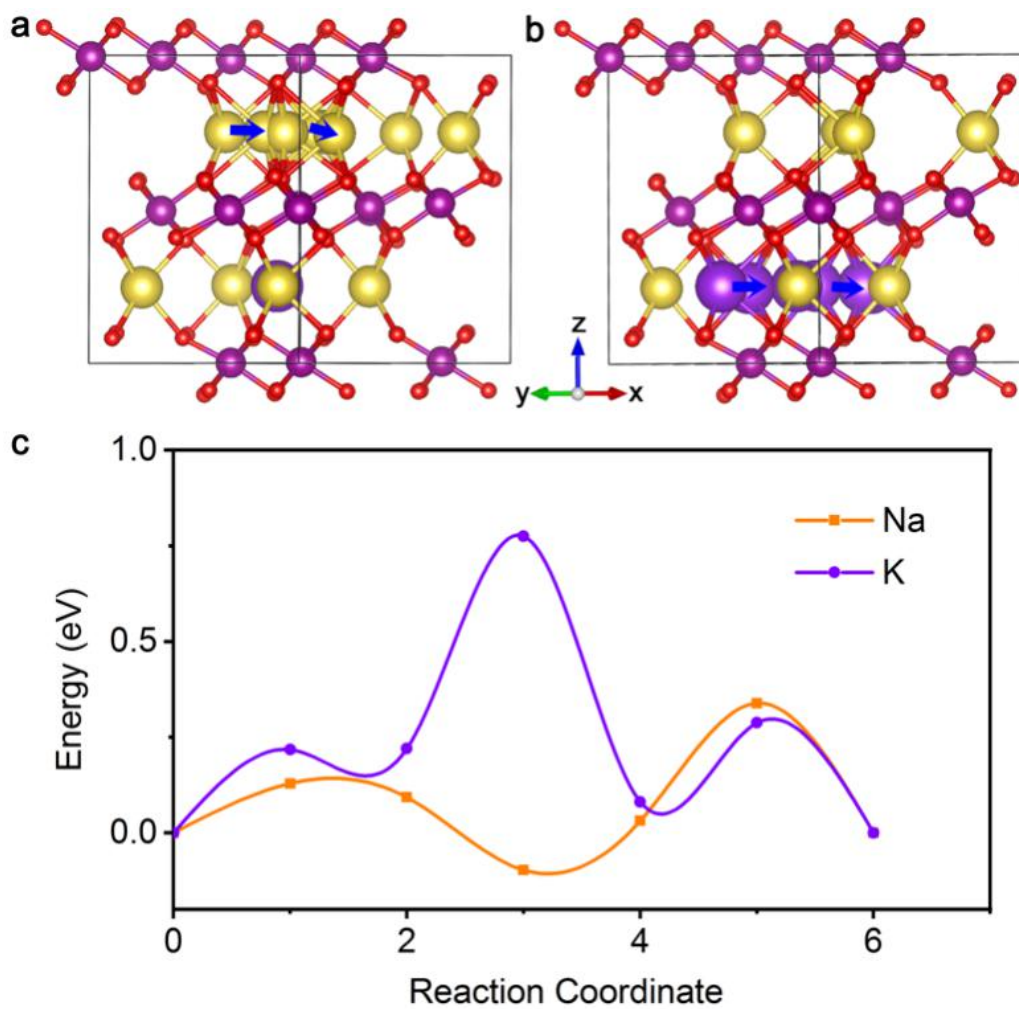

**Supplementary Fig. 24** Diffusion path for  $\text{Na}^+$  (a) and  $\text{K}^+$  (b) and their migration energy barrier (c) in  $\text{Na}_{0.612}\text{K}_{0.056}\text{MnO}_2$ .

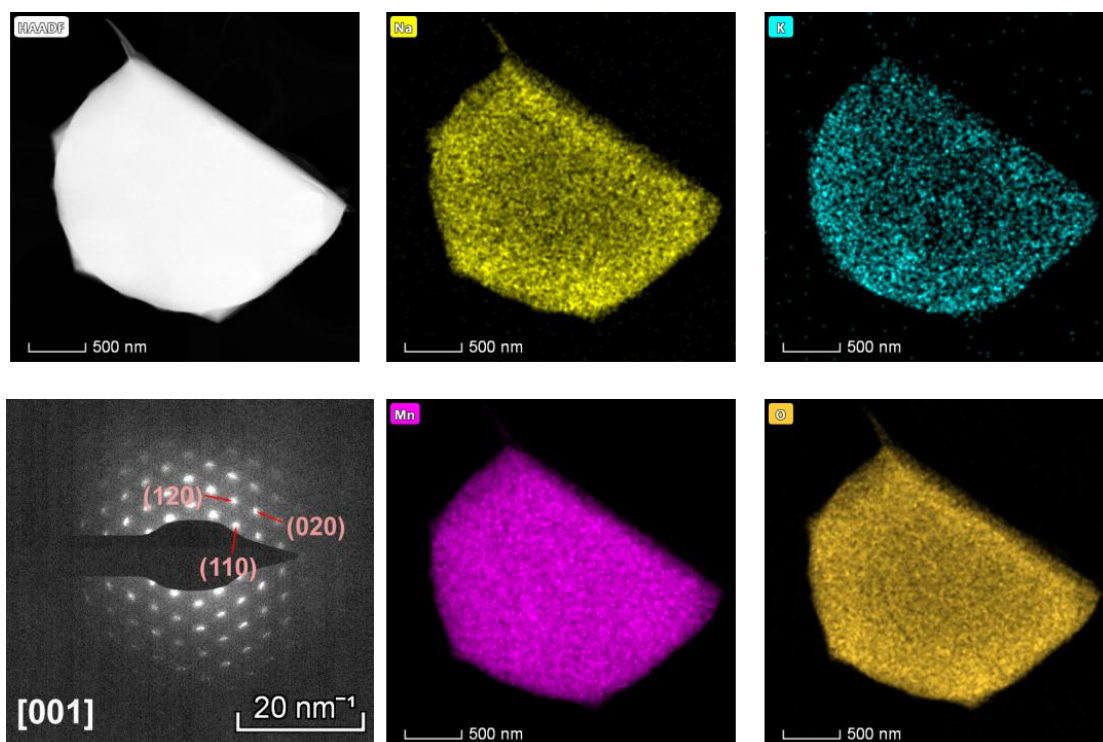

**Supplementary Fig. 25** TEM elemental mappings and selected area electron diffraction (SAED) of the as-synthesized  $\text{Na}_{0.612}\text{K}_{0.056}\text{MnO}_2$ . SAED implies a pure P2 phase and the elemental mappings show uniform distribution of Na, K, Mn, and O in pristine  $\text{Na}_{0.612}\text{K}_{0.056}\text{MnO}_2$ .

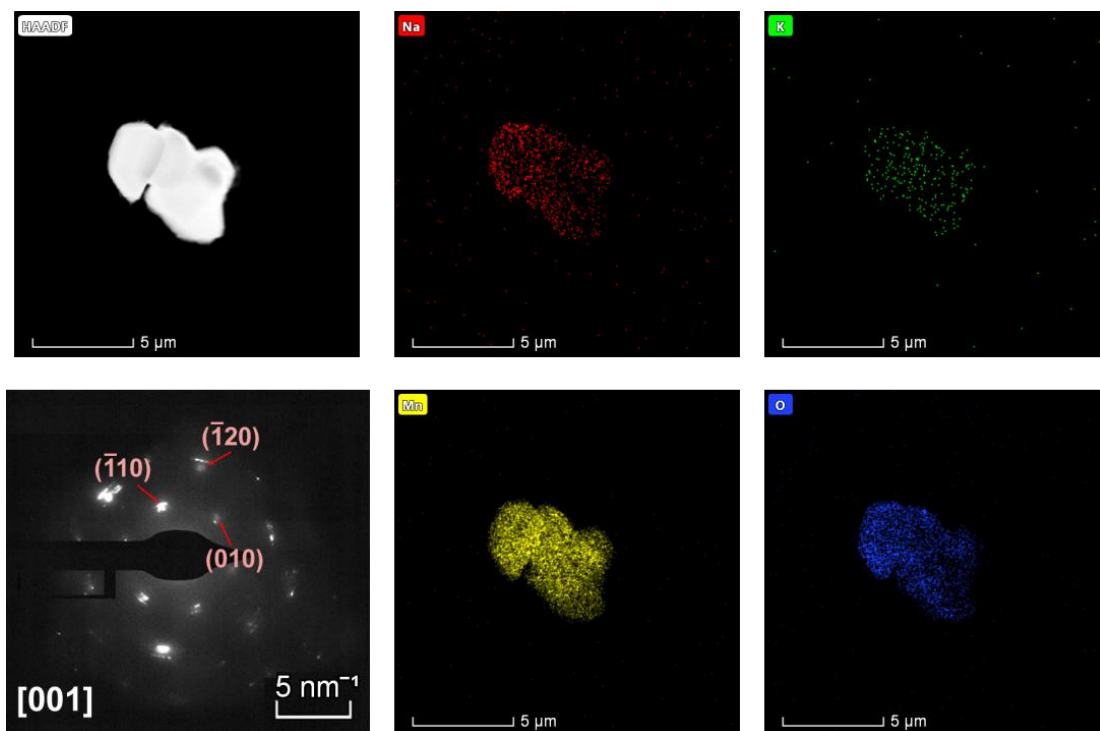

Supplementary Fig. 26 TEM elemental mappings and SAED of  $\text{Na}_{0.612}\text{K}_{0.056}\text{MnO}_2$  after the first charge. SAED implies that a pure P2 phase was maintained after charging. The elemental mappings show uniform distribution of Na, K, Mn, and O after charge.

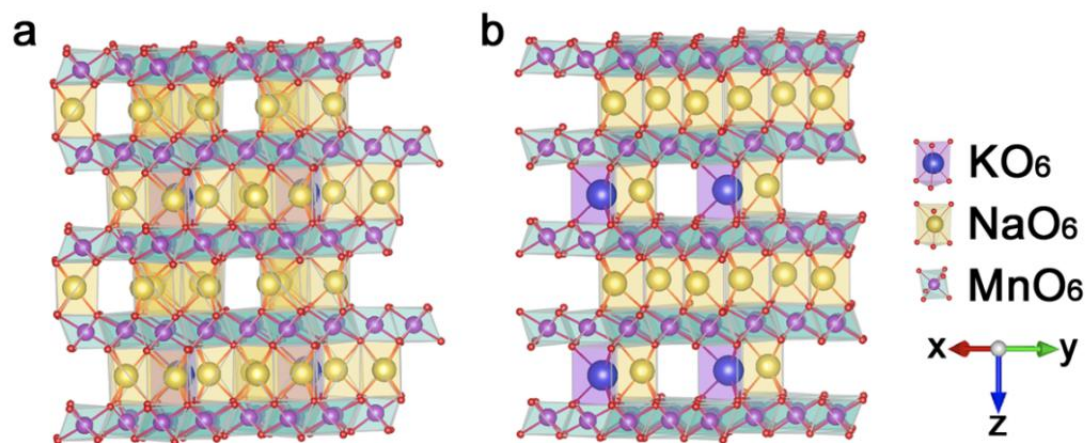

Supplementary Fig. 27 Optimized structure of P2-Na<sub>0.500</sub>K<sub>0.055</sub>MnO<sub>2</sub> (a) and P2-Na<sub>0.220</sub>K<sub>0.055</sub>MnO<sub>2</sub> (b).

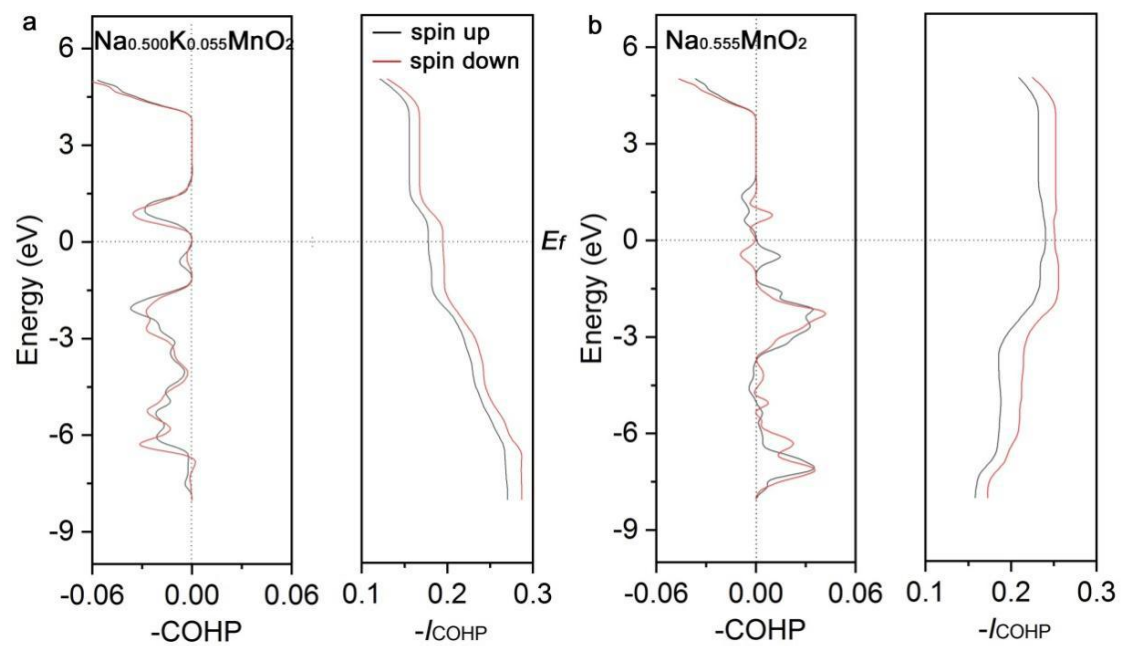

**Supplementary Fig. 28 -COHP and corresponding integrated ( $-\text{ICOHP}$ ) curves for K-O in  $\text{Na}_{0.500}\text{K}_{0.055}\text{MnO}_2$  (a) and Na-O in  $\text{Na}_{0.555}\text{MnO}_2$  (b).**

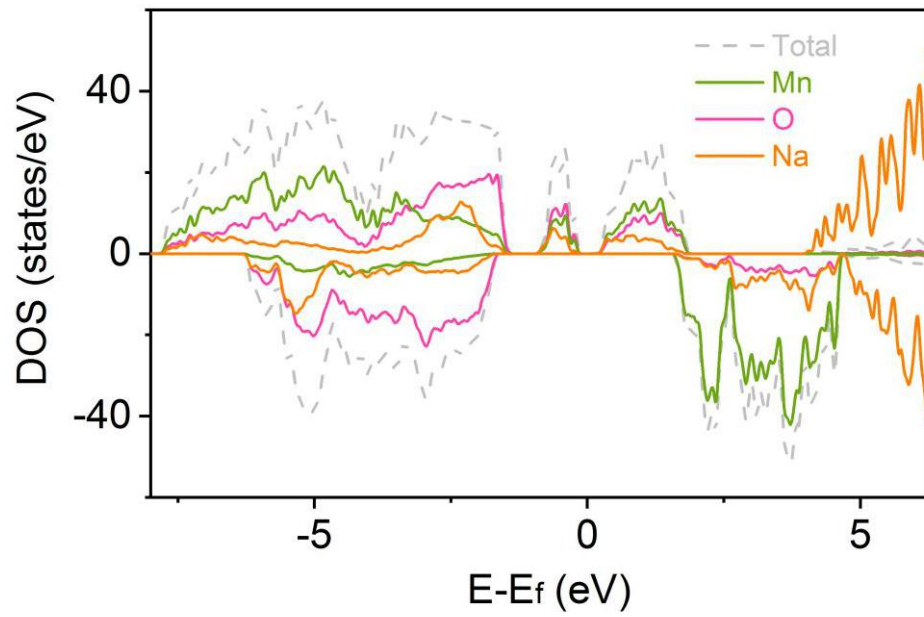

**Supplementary Fig. 29** tDOS of  $\text{Na}_{0.555}\text{MnO}_2$  and pDOS of Na 3s, K 4s, O 2p and Mn 3d orbitals. The Fermi energy is set to 0 eV.

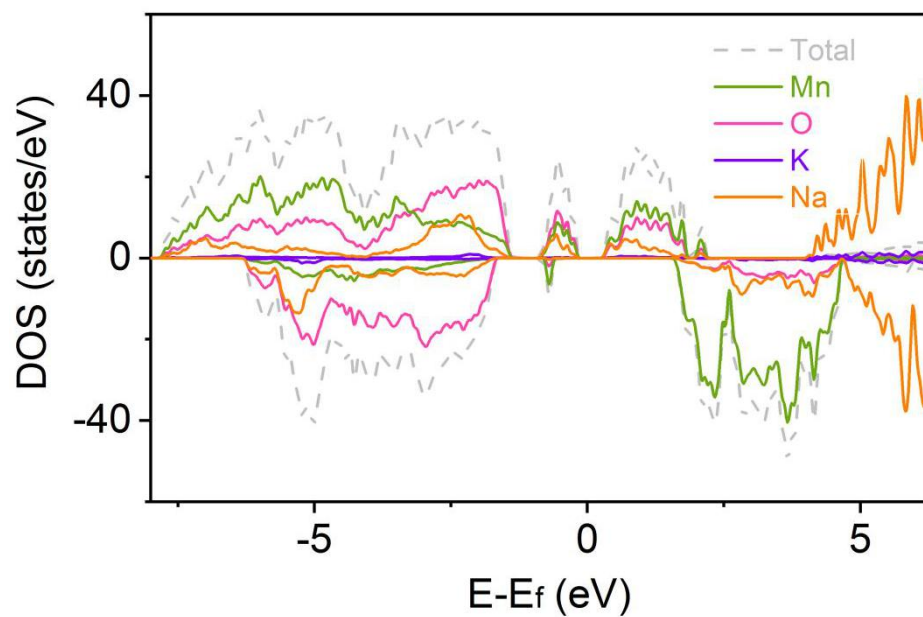

**Supplementary Fig. 30** tDOS of  $\text{Na}_{0.500}\text{K}_{0.055}\text{MnO}_2$  and pDOS of Na 3s, K 4s, O 2p and Mn 3d orbitals. The Fermi energy is set to 0 eV.

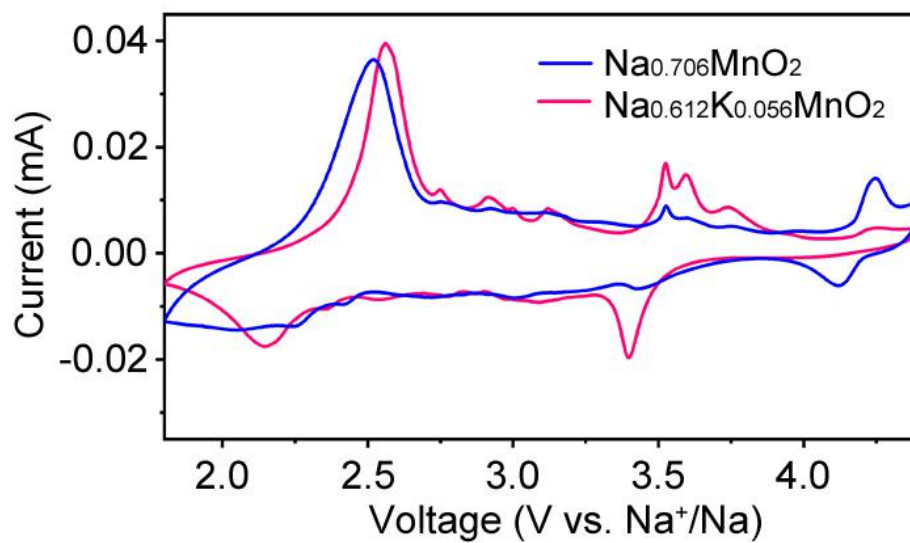

**Supplementary Fig. 31** CV curves of Na<sub>0.612</sub>K<sub>0.056</sub>MnO<sub>2</sub> and Na<sub>0.706</sub>MnO<sub>2</sub> at a scan rate of 0.1 mV s<sup>-1</sup>.



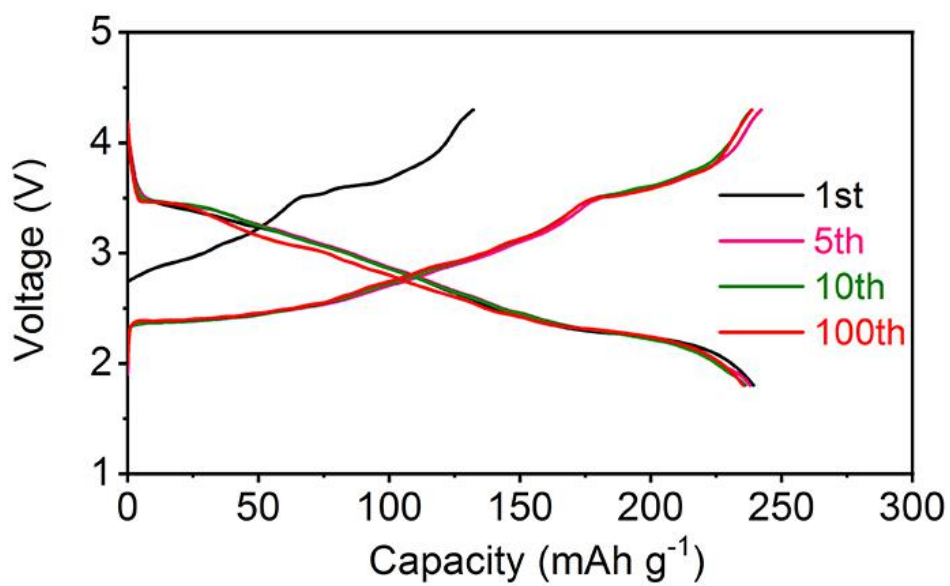

**Supplementary Fig. 32 Selected charge/discharge curves of  $\text{Na}_{0.612}\text{K}_{0.056}\text{MnO}_2$  at  $50 \text{ mA g}^{-1}$  during 100 cycles.**

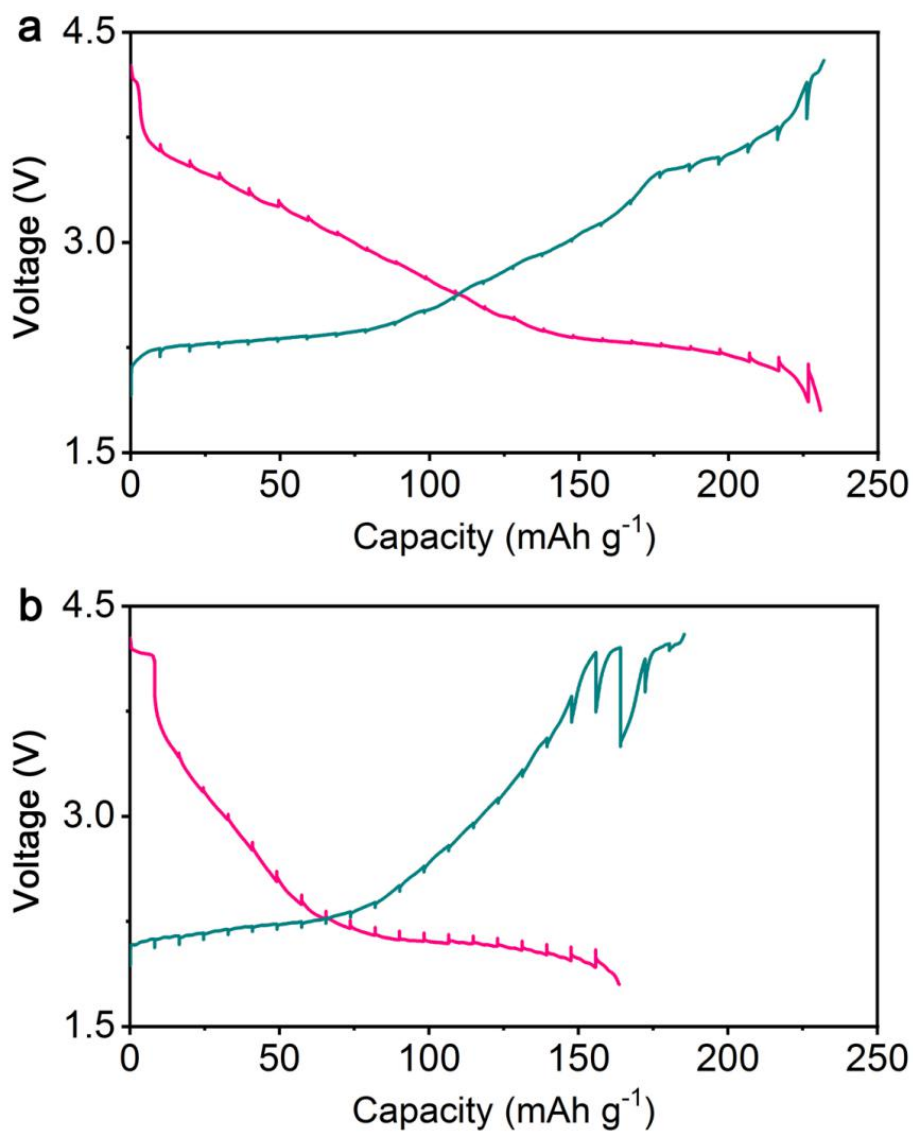

**Supplementary Fig. 33** GITT curves of  $\text{Na}_{0.612}\text{K}_{0.056}\text{MnO}_2$  (a) and  $\text{Na}_{0.706}\text{MnO}_2$  (b) during the second cycle in the voltage range of 1.8-4.3 V.

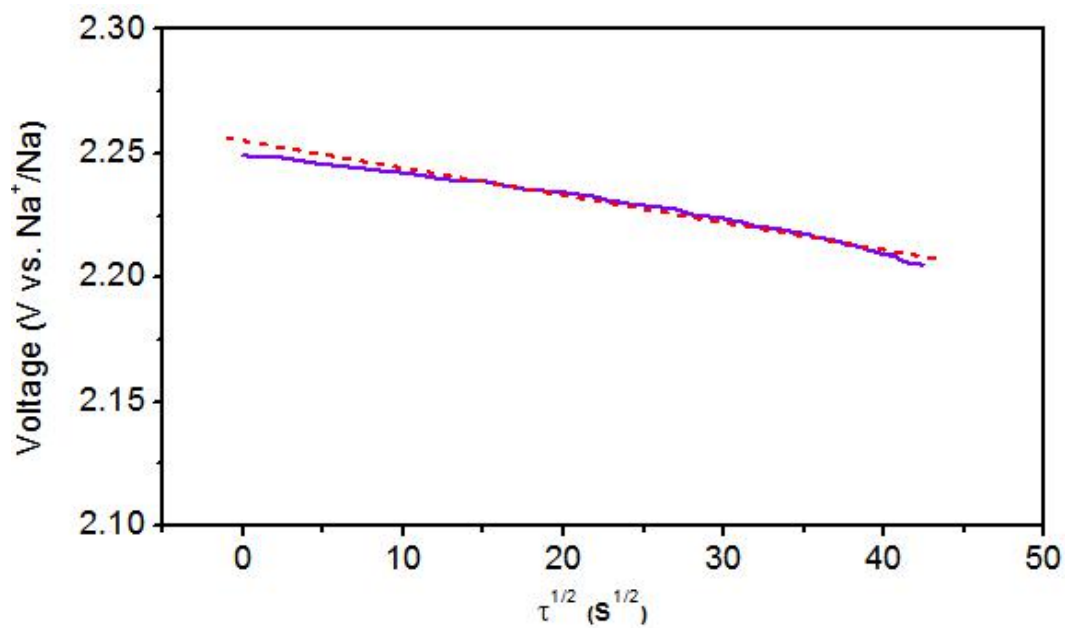

Supplementary Fig. 34 Linear fitting of Na<sub>0.612</sub>K<sub>0.056</sub>MnO<sub>2</sub> electrode at 2.25 V in the second discharge process.

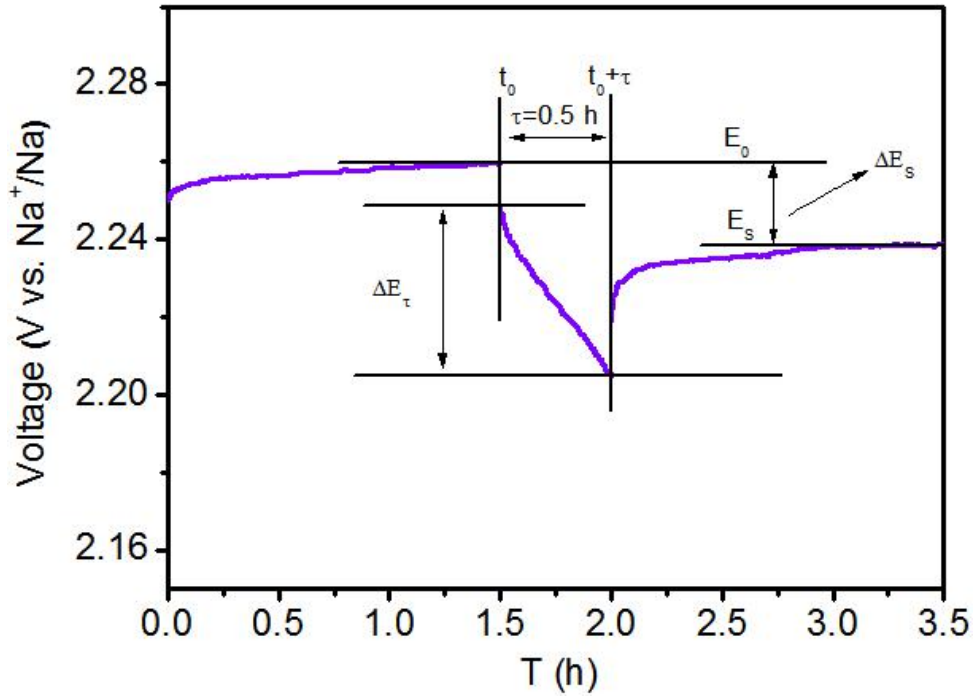

**Supplementary Fig. 35 Current step diagrams of  $\text{Na}_{0.612}\text{K}_{0.056}\text{MnO}_2$  electrode at 2.25 V in the second discharge process.** The diffusion coefficient of  $\text{Na}^+$  can be determined by applying the Fick's second law of diffusion, and the Equation is as following:

$$D_{\text{Na}^+} = \frac{4}{\pi\tau} \left( \frac{m_B V_m}{M_B A} \right)^2 \left( \frac{\Delta E_s}{\Delta E_\tau} \right)^2$$

Where  $M_B$ ,  $V_m$ , and  $m_B$  are molecular weight, molar volume, and mass of electrode material, respectively,  $A$  is geometric area of electrode.  $\Delta E_s$  and  $\Delta E_\tau$  represent the change of quasi-equilibrium potential and battery voltage, respectively.

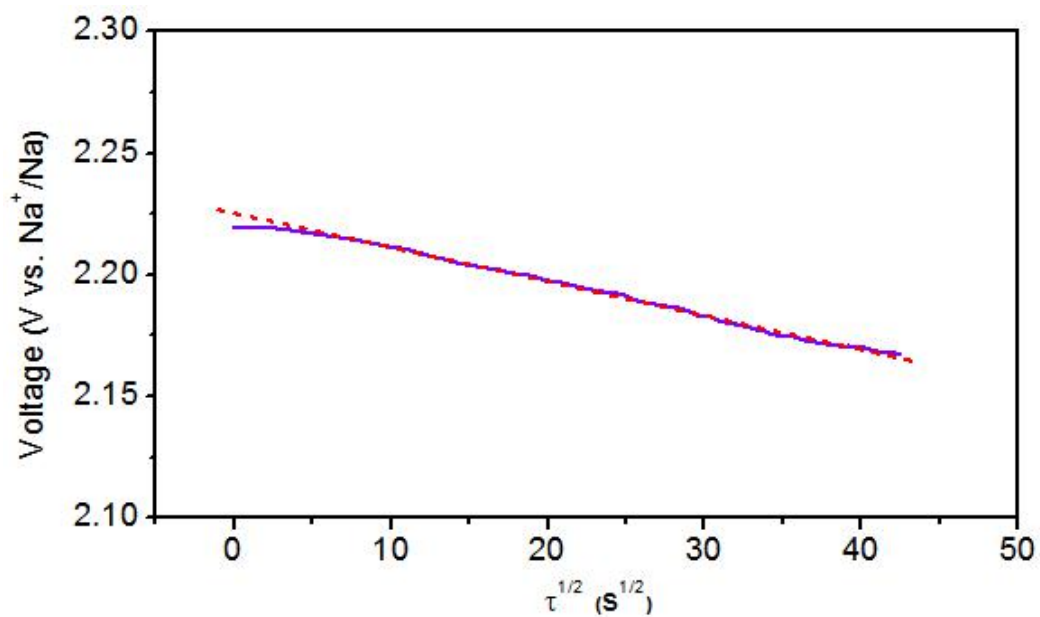

Supplementary Fig. 36 Linear fitting of Na<sub>0.706</sub>MnO<sub>2</sub> electrode at 2.22 V in the second discharge process.

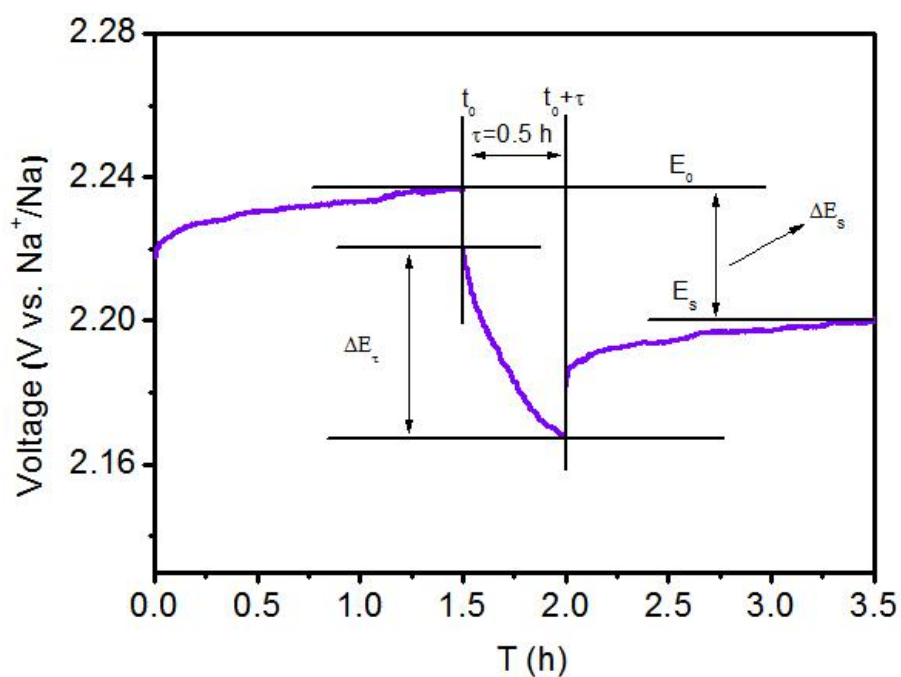

Supplementary Fig. 37 Current step diagrams of Na<sub>0.706</sub>MnO<sub>2</sub> electrode at 2.22 V in the second discharge process.

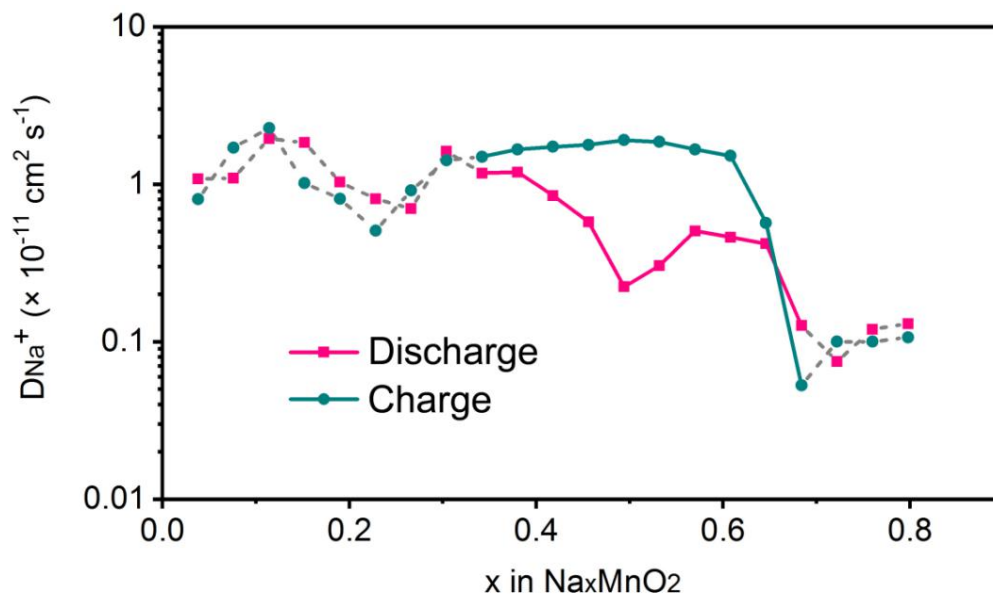

**Supplementary Fig. 38** Variation of  $D_{\text{Na}^+}$  as functions of  $x$  in  $\text{Na}_x\text{MnO}_2$  determined by GITT, where the gray area represents the two-phase region.

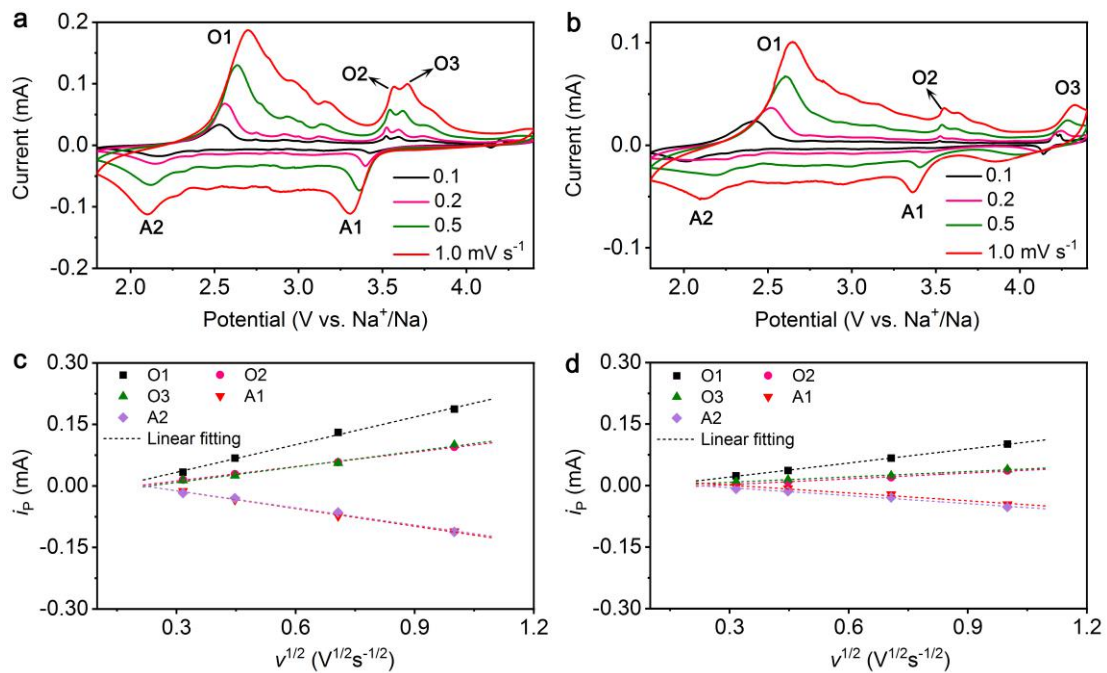

**Supplementary Fig. 39** CV curves of  $\text{Na}_{0.612}\text{K}_{0.056}\text{MnO}_2$  (a) and  $\text{Na}_{0.706}\text{MnO}_2$  (b) at different scan rates of 0.1, 0.2, 0.5 and 1.0  $\text{mV s}^{-1}$ . Linear relationship of the peak current ( $i_p$ ) and the square root of scan rate ( $v^{1/2}$ ) for peaks of O1, O2, O3, A1 and A2 in **Supplementary Fig. 39a** (c) and **Supplementary Fig. 39b** (d).

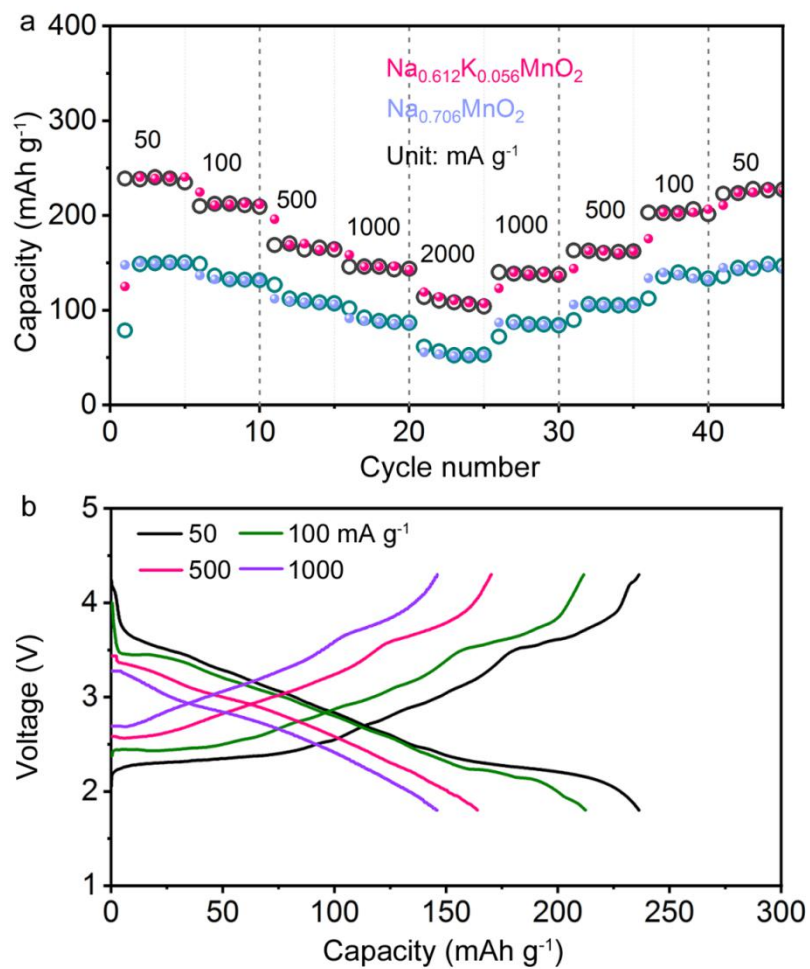

**Supplementary Fig. 40 a**, Rate performance of Na<sub>0.612</sub>K<sub>0.056</sub>MnO<sub>2</sub> and Na<sub>0.706</sub>MnO<sub>2</sub>.  
**b**, Typical discharge/charge curves of Na<sub>0.612</sub>K<sub>0.056</sub>MnO<sub>2</sub> at different current densities.



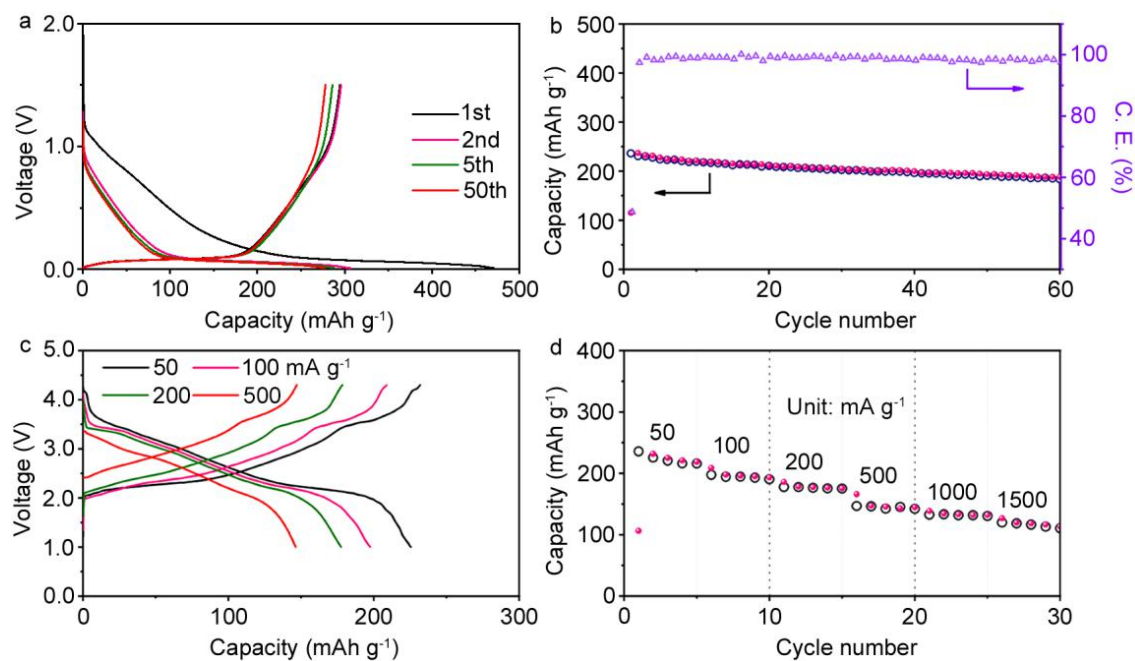

**Supplementary Fig. 41 Electrochemical performance of HC electrode and HC//Na<sub>0.612</sub>K<sub>0.056</sub>MnO<sub>2</sub> full battery.** **a**, Selected charge/discharge curves of HC at 50 mA g<sup>-1</sup> during 50 cycles. **b**, Cycle performance of HC//Na<sub>0.612</sub>K<sub>0.056</sub>MnO<sub>2</sub> full battery at 50 mA g<sup>-1</sup> in the voltage range of 1.0 V - 4.3 V. **c**, Typical discharge/charge curves of HC//Na<sub>0.612</sub>K<sub>0.056</sub>MnO<sub>2</sub> full battery at different current densities. **d**, Rate performance of HC//Na<sub>0.612</sub>K<sub>0.056</sub>MnO<sub>2</sub> full battery.

## Supplementary Tables

**Supplementary Table 1. ICP-OES of the synthesized P2-Na<sub>0.612</sub>K<sub>0.056</sub>MnO<sub>2</sub> and charged and discharged electrodes.**

| Elements | Atomic ratio |         |            |
|----------|--------------|---------|------------|
|          | Pristine     | Charged | Discharged |
| Na       | 0.612        | 0.116   | 1.010      |
| K        | 0.056        | 0.055   | 0.055      |
| Mn       | 1.00         | 1.00    | 1.00       |

**Supplementary Table 2. Results of iodometric titration on discharged K-doped cathode.**

|                                                        | 1     | 2     | 3     |
|--------------------------------------------------------|-------|-------|-------|
| V (Na <sub>2</sub> S <sub>2</sub> O <sub>3</sub> , mL) | 12.60 | 12.65 | 12.65 |
| Valence of Mn                                          | 3.298 | 3.303 | 3.303 |
| $\delta$                                               | 0.017 | 0.015 | 0.015 |

**Supplementary Table 3. Structure parameters of Na<sub>0.612</sub>K<sub>0.056</sub>MnO<sub>2</sub> determined from the XRD Rietveld refinement.**

| Atom | Site       | <i>g</i> | <i>x</i> | <i>y</i> | <i>z</i> |
|------|------------|----------|----------|----------|----------|
| Na1  | 2 <i>c</i> | 0.320(1) | 1/3      | 2/3      | 1/4      |
| Na2  | 2 <i>b</i> | 0.294(2) | 0        | 0        | 1/4      |
| K1   | 2 <i>b</i> | 0.056(2) | 1/3      | 2/3      | 1/4      |
| Mn   | 2 <i>a</i> | 1.0      | 0.0      | 0.0      | 1/2      |
| O1   | 4 <i>f</i> | 1.0      | 2/3      | 1/3      | 0.085(1) |

Space group:  $P6_3/m m c$  (194),  $a = b = 2.868(3)$ ,  $c = 11.134(10)$  Å,  $\alpha = \beta = 90^\circ$ ,  $\gamma = 120^\circ$ , Vol = 79.310 Å<sup>3</sup> ( $Z = 2$ ),  $R_p = 2.93\%$ ,  $R_{wp} = 3.96\%$ ,  $\chi^2 = 2.987$ . *g*: occupancy. *x*, *y*, and *z*: atomic coordinate.

**Supplementary Table 4. Structure parameters of Na<sub>0.706</sub>MnO<sub>2</sub> determined from the XRD Rietveld refinement.**

| Atom | Site       | <i>g</i>  | <i>x</i> | <i>y</i> | <i>z</i> |
|------|------------|-----------|----------|----------|----------|
| Na1  | 2 <i>c</i> | 0.323(11) | 1/3      | 2/3      | 1/4      |
| Na2  | 2 <i>b</i> | 0.388(11) | 0        | 0        | 1/4      |
| Mn   | 2 <i>a</i> | 1.0       | 0.0      | 0.0      | 1/2      |
| O1   | 4 <i>f</i> | 1.0       | 2/3      | 1/3      | 0.088(1) |

Space group:  $P6_3/m m c$  (194),  $a = b = 2.870(2)$ ,  $c = 11.158(9)$  Å,  $\alpha = \beta = 90^\circ$ ,  $\gamma = 120^\circ$ , Vol = 79.321 Å<sup>3</sup> ( $Z = 2$ ),  $R_p = 4.64\%$ ,  $R_{wp} = 6.56\%$ ,  $\chi^2 = 6.104$ . *g*: occupancy. *x*, *y*, and *z*: atomic coordinate.

**Supplementary Table 5. Synchrotron pair distribution function (PDF) refined structural parameters of Na<sub>0.612</sub>K<sub>0.056</sub>MnO<sub>2</sub>.**

| Atom | Site       | <i>g</i> | <i>x</i> | <i>y</i> | <i>z</i>  |
|------|------------|----------|----------|----------|-----------|
| Na1  | 2 <i>d</i> | 0.298    | 1/3      | 2/3      | 1/4       |
| Na2  | 2 <i>b</i> | 0.314    | 0        | 0        | 1/4       |
| K1   | 2 <i>d</i> | 0.056    | 1/3      | 2/3      | 1/4       |
| Mn   | 2 <i>a</i> | 1.0      | 0.0      | 0.0      | 1/2       |
| O1   | 4 <i>f</i> | 1.0      | 2/3      | 1/3      | 0.0849(6) |

Space group:  $P6_3/m m c$  (194),  $a = b = 2.8696 \text{ \AA}$ ,  $c = 11.1243 \text{ \AA}$ ,  $\alpha = \beta = 90^\circ$ ,  $\gamma = 120^\circ$ ,  
 Vol =  $79.331 \text{ \AA}^3$ ,  $\chi^2 = 2.3524$ . *g*: occupancy. *x*, *y*, and *z*: atomic coordinate.

**Supplementary Table 6. Synchrotron pair distribution function (PDF) refined structural parameters of Na<sub>0.706</sub>MnO<sub>2</sub>.**

| Atom | Site       | <i>g</i> | <i>x</i> | <i>y</i> | <i>z</i>  |
|------|------------|----------|----------|----------|-----------|
| Na1  | 2 <i>d</i> | 0.350    | 1/3      | 2/3      | 1/4       |
| Na2  | 2 <i>b</i> | 0.356    | 0        | 0        | 1/4       |
| Mn   | 2 <i>a</i> | 1.0      | 0.0      | 0.0      | 1/2       |
| O1   | 4 <i>f</i> | 1.0      | 2/3      | 1/3      | 0.0862(6) |

Space group:  $P6_3/m m c$  (194),  $a = b = 2.8703 \text{ \AA}$ ,  $c = 11.1533 \text{ \AA}$ ,  $\alpha = \beta = 90^\circ$ ,  $\gamma = 120^\circ$ ,  
Vol =  $79.577 \text{ \AA}^3$ ,  $\chi^2 = 1.7982$ . *g*: occupancy. *x*, *y*, and *z*: atomic coordinate.

**Supplementary Table 7. Extracted parameters from EXAFS spectra fitting of  $\text{Na}_{0.612}\text{K}_{0.056}\text{MnO}_2$ .**

| Scattering path | CN | R (Å) | $\sigma^2$ (Å <sup>2</sup> ) |
|-----------------|----|-------|------------------------------|
| Mn-O            | 6  | 1.889 | 0.00671                      |
| Mn-Mn           | 6  | 2.889 | 0.01057                      |

$R$ -value: 0.00998,  $S_0^2$ : 0.80,  $E_0$ : -5.5 eV.



**Supplementary Table 8. Extracted parameters from EXAFS spectra fitting of  $\text{Na}_{0.076}\text{MnO}_2$ .**

| Scattering path | CN | R ( $\text{\AA}$ ) | $\sigma^2$ ( $\text{\AA}^2$ ) |
|-----------------|----|--------------------|-------------------------------|
| Mn-O            | 6  | 1.895              | 0.00516                       |
| Mn-Mn           | 6  | 2.897              | 0.00892                       |

$R$ -value: 0.00705,  $S_0^2$  : 0.80 ,  $E_0$ : -4.1 eV.

**Supplementary Table 9. Structure parameters of  $\text{K}_{0.67}\text{MnO}_2$  determined from the XRD Rietveld refinement.**

| Atom | Site        | <i>g</i> | <i>x</i>  | <i>y</i> | <i>z</i> |
|------|-------------|----------|-----------|----------|----------|
| K1   | 8 <i>g</i>  | 0.184(5) | -0.196(8) | 0.193(9) | 1/4      |
| K2   | 8 <i>g</i>  | 0.353(3) | 0.261(3)  | 0.495(2) | 1/4      |
| Mn   | 4 <i>a</i>  | 1.0      | 0.0       | 0.0      | 0.0      |
| O1   | 16 <i>h</i> | 1.0      | 0.369(1)  | 0.157(1) | 0.007(8) |

Space group: *ccmm* (63),  $a = 5.165(6)$ ,  $b = 2.845(3)$ ,  $c = 12.755(6)$  Å,  $\alpha = \beta = \gamma = 90^\circ$ ,  
 Vol = 187.525 Å<sup>3</sup> ( $Z = 4$ ),  $R_p = 5.51\%$ ,  $R_{wp} = 3.94\%$ ,  $\chi^2 = 1.35$ . *g*: occupancy. *x*, *y*, and  
*z*: atomic coordinate.

**Supplementary Table 10. Structure parameters of Na<sub>0.114</sub>K<sub>0.056</sub>MnO<sub>2</sub> determined from the XRD Rietveld refinement.**

| Atom | Site       | <i>g</i> | <i>x</i> | <i>y</i> | <i>z</i> |
|------|------------|----------|----------|----------|----------|
| Na1  | 2 <i>d</i> | 0.090(3) | 1/3      | 2/3      | 1/4      |
| Na2  | 2 <i>b</i> | 0.024(5) | 0        | 0        | 1/4      |
| K1   | 2 <i>d</i> | 0.056(4) | 1/3      | 2/3      | 1/4      |
| Mn   | 2 <i>a</i> | 1.0      | 0.0      | 0.0      | 1/2      |
| O1   | 4 <i>f</i> | 1.0      | 2/3      | 1/3      | 0.069(2) |

Space group:  $P6_3/m\ m\ c$  (194),  $a = b = 2.8465(9)$ ,  $c = 11.1987(2)$  Å,  $\alpha = \beta = 90^\circ$ ,  $\gamma = 120^\circ$ , Vol = 78.587 Å<sup>3</sup>,  $R_p = 2.35\%$ ,  $R_{wp} = 3.14\%$ ,  $\chi^2 = 1.265$ . *g*: occupancy. *x*, *y*, and *z*: atomic coordinate.

**Supplementary Table 11. Structure parameters of Na<sub>1.015</sub>K<sub>0.056</sub>MnO<sub>2</sub> determined from the XRD Rietveld refinement.**

| Atom | Site       | <i>g</i> | <i>x</i> | <i>y</i>   | <i>z</i>  |
|------|------------|----------|----------|------------|-----------|
| Na1  | 4 <i>c</i> | 0.381(6) | 0        | -0.0866(3) | 1/4       |
| Na2  | 4 <i>c</i> | 0.633(4) | 0        | 0.6253(4)  | 1/4       |
| K1   | 4 <i>c</i> | 0.056(1) | 0        | 0.6253(4)  | 1/4       |
| Mn   | 4 <i>a</i> | 1.0      | 0.0      | 0.0        | 0.0       |
| O1   | 8 <i>f</i> | 1.0      | 0        | 0.6438(5)  | 0.9032(4) |

Space group: *cmcm* (63),  $a = 2.8841(2)$ ,  $b = 5.4855(5)$ ,  $c = 10.8045(2)$  Å,  $\alpha = \beta = \gamma = 90^\circ$ , Vol = 170.938 Å<sup>3</sup> ( $Z = 4$ ),  $R_{wp} = 4.44\%$ ,  $\chi^2 = 3.58$ . *g*: occupancy. *x*, *y* and *z*: atomic coordinate.

**Supplementary Table 12. Mixed P2 and OP4 phases of Na<sub>0.327</sub>MnO<sub>2</sub> determined from the XRD Rietveld refinement.**

**P2- Na<sub>0.327</sub>MnO<sub>2</sub>:**

| Atom | Site       | <i>g</i> | <i>x</i> | <i>y</i> | <i>z</i> |
|------|------------|----------|----------|----------|----------|
| Na1  | 2 <i>c</i> | 0.268(6) | 1/3      | 2/3      | 1/4      |
| Na2  | 2 <i>b</i> | 0.088(8) | 0        | 0        | 1/4      |
| Mn   | 2 <i>a</i> | 1.0      | 0.0      | 0.0      | 1/2      |
| O1   | 4 <i>f</i> | 1.0      | 2/3      | 1/3      | 0.068(1) |

Space group:  $P6_3/m\ m\ c$  (194),  $a = b = 2.8421(5)$ ,  $c = 11.1947(9)$  Å,  $\alpha = \beta = 90^\circ$ ,  $\gamma = 120^\circ$ , Vol = 78.266 Å<sup>3</sup>. *g*: occupancy. *x*, *y*, and *z*: atomic coordinate.

**OP4- Na<sub>0.327</sub>MnO<sub>2</sub>:**

| Atom | Site       | <i>g</i> | <i>x</i> | <i>y</i> | <i>z</i> |
|------|------------|----------|----------|----------|----------|
| Na1  | 2 <i>d</i> | 0.160(5) | 2/3      | 1/3      | 1/4      |
| Na2  | 2 <i>c</i> | 0.060(4) | 1/3      | 2/3      | 1/4      |
| Na3  | 2 <i>a</i> | 0.111(2) | 0        | 0        | 1/2      |
| Mn   | 4 <i>f</i> | 1.0      | 2/3      | 1/3      | 0.384(4) |
| O1   | 4 <i>f</i> | 1.0      | 1/3      | 2/3      | 0.434(6) |
| O2   | 8 <i>e</i> | 1.0      | 0        | 0        | 0.341(2) |

Space group:  $P6_3mc$  (186),  $a = b = 2.817(11)$ ,  $c = 17.812(14)$  Å,  $\alpha = \beta = 90^\circ$ ,  $\gamma = 120^\circ$ , Vol = 122.402 Å<sup>3</sup>. *g*: occupancy. *x*, *y* and *z*: atomic coordinate.

**Ratio of P2 and OP4:** 87.0% : 13.0%,  $R_p = 2.60\%$ ,  $R_{wp} = 3.38\%$ ,  $\chi^2 = 3.796$ .

**Supplementary Table 13. Structure parameters of Na<sub>0.998</sub>MnO<sub>2</sub> determined from the XRD Rietveld refinement.**

| Atom | Site       | <i>g</i> | <i>x</i> | <i>y</i>  | <i>z</i> |
|------|------------|----------|----------|-----------|----------|
| Na1  | 4 <i>c</i> | 0.363(4) | 0        | -0.084(8) | 1/4      |
| Na2  | 4 <i>c</i> | 0.640(5) | 0        | 0.641(5)  | 1/4      |
| Mn   | 4 <i>a</i> | 1.0      | 0.0      | 0.0       | 0.0      |
| O1   | 8 <i>f</i> | 1.0      | 0        | 0.632(2)  | 0.900(1) |

Space group: *cmcm* (63),  $a = 2.915(2)$ ,  $b = 5.544(4)$ ,  $c = 10.915(9)$  Å,  $\alpha = \beta = \gamma = 90^\circ$ ,  
 Vol = 176.434 Å<sup>3</sup> ( $Z = 4$ ),  $R_p = 2.31\%$ ,  $R_{wp} = 3.69\%$ ,  $\chi^2 = 9.454$ . *g*: occupancy. *x*, *y*  
 and *z*: atomic coordinate.

**Supplementary Table 14. Crystal orbital Hamilton populations (COHP) of  $\text{Na}_{0.555}\text{MnO}_2$  and  $\text{Na}_{0.500}\text{K}_{0.055}\text{MnO}_2$ .**

| Atoms in<br>$\text{Na}_{0.555}\text{MnO}_2$ | -COHP<br>(eF) | Atoms in<br>$\text{Na}_{0.500}\text{K}_{0.055}\text{MnO}_2$ | -COHP<br>(eF) |
|---------------------------------------------|---------------|-------------------------------------------------------------|---------------|
| Na1-O9                                      | 0.273         | K1-O9                                                       | 0.180         |
| Na1-O1                                      | 0.239         | K1-O1                                                       | 0.179         |
| Na1-O33                                     | 0.304         | K1-O33                                                      | 0.178         |
| Na1-O36                                     | 0.255         | K1-O36                                                      | 0.177         |
| Na1-O12                                     | 0.218         | K1-O12                                                      | 0.191         |
| Na1-O4                                      | 0.317         | K1-O4                                                       | 0.193         |
| <b>average</b>                              | <b>0.267</b>  | <b>average</b>                                              | <b>0.183</b>  |
| Mn8-O9                                      | 1.535         | Mn8-O9                                                      | 1.549         |
| Mn10-O1                                     | 1.176         | Mn10-O1                                                     | 1.234         |
| Mn2-O33                                     | 1.387         | Mn2-O33                                                     | 1.467         |
| Mn3-O36                                     | 1.411         | Mn3-O36                                                     | 1.507         |
| Mn7-O12                                     | 1.361         | Mn7-O12                                                     | 1.450         |
| Mn1-O4                                      | 0.649         | Mn1-O4                                                      | 1.217         |
| <b>average</b>                              | <b>1.253</b>  | <b>average</b>                                              | <b>1.404</b>  |

**Supplementary Table 15. Crystal orbital Hamilton populations (COHP) of  $\text{Na}_{0.555}\text{MnO}_2$  and  $\text{Na}_{0.500}\text{K}_{0.055}\text{MnO}_2$ .** It shows the influence of K on the adjacent Mn-O bonds (Mn2) and distant Mn-O bonds (Mn15, Mn10), as well as Mn atoms at different valence states (the valences for Mn10 and Mn15 are 4+ and 3+, respectively.).

| Atoms in<br>$\text{Na}_{0.555}\text{MnO}_2$ | -COHP<br>(eF) | Atoms in<br>$\text{Na}_{0.500}\text{K}_{0.055}\text{MnO}_2$ | -COHP<br>(eF) |
|---------------------------------------------|---------------|-------------------------------------------------------------|---------------|
| Mn10-O19                                    | 0.709         | Mn10-O19                                                    | 1.399         |
| Mn10-O21                                    | 1.282         | Mn10-O21                                                    | 1.494         |
| Mn10-O25                                    | 1.340         | Mn10-O25                                                    | 1.491         |
| Mn10-O31                                    | 1.442         | Mn10-O31                                                    | 1.283         |
| Mn10-O35                                    | 1.490         | Mn10-O35                                                    | 1.456         |
| Mn10-O37                                    | 0.790         | Mn10-O37                                                    | 1.545         |
| <b>average</b>                              | <b>1.176</b>  | <b>average</b>                                              | <b>1.445</b>  |
| Mn15-O26 (z ligand)                         | 1.335         | Mn15-O26                                                    | 1.348         |
| Mn15-O28 (xy-plane)                         | 0.848         | Mn15-O28                                                    | 1.372         |
| Mn15-O30 (xy-plane)                         | 1.232         | Mn15-O30                                                    | 1.600         |
| Mn15-O48 (xy-plane)                         | 1.312         | Mn15-O48                                                    | 1.350         |
| Mn15-O50 (xy-plane)                         | 0.649         | Mn15-O50                                                    | 1.429         |
| Mn15-O52 (z ligand)                         | 1.589         | Mn15-O52                                                    | 1.553         |
| <b>average</b>                              | <b>1.161</b>  | <b>average</b>                                              | <b>1.442</b>  |
| Mn2-O22 (z ligand)                          | 1.197         | Mn2-O22                                                     | 1.501         |
| Mn2-O24 (xy-plane)                          | 0.743         | Mn2-O24                                                     | 1.455         |
| Mn2-O33 (xy-plane)                          | 1.387         | Mn2-O33                                                     | 1.467         |
| Mn2-O34 (xy-plane)                          | 1.171         | Mn2-O34                                                     | 1.426         |
| Mn2-O36 (xy-plane)                          | 0.799         | Mn2-O36                                                     | 1.480         |
| Mn2-O38 (z ligand)                          | 1.579         | Mn2-O38                                                     | 1.579         |
| <b>average</b>                              | <b>1.146</b>  | <b>average</b>                                              | <b>1.485</b>  |



**Supplementary Table 16. Crystal orbital Hamilton populations (COHP) of  $\text{Na}_{0.555}\text{MnO}_2$  and  $\text{Na}_{0.500}\text{K}_{0.055}\text{MnO}_2$  at their fully charged state.**

| Atoms in<br>$\text{Na}_{0.222}\text{MnO}_2$ | -COHP<br>(eF) | Atoms in<br>$\text{Na}_{0.167}\text{K}_{0.055}\text{MnO}_2$ | -COHP<br>(eF) |
|---------------------------------------------|---------------|-------------------------------------------------------------|---------------|
| Na1-O26                                     | 0.356         | K1-O19                                                      | 0.210         |
| Na1-O28                                     | 0.330         | K1-O22                                                      | 0.210         |
| Na1-O42                                     | 0.329         | K1-O23                                                      | 0.203         |
| Na1-O52                                     | 0.356         | K1-O26                                                      | 0.203         |
| Na1-O66                                     | 0.340         | K1-O35                                                      | 0.204         |
| Na1-O68                                     | 0.339         | K1-O38                                                      | 0.205         |
| <b>average</b>                              | <b>0.342</b>  | <b>average</b>                                              | <b>0.206</b>  |
| Mn6-O26                                     | 1.511         | Mn4-O19                                                     | 1.618         |
| Mn4-O28                                     | 1.639         | Mn3-O22                                                     | 1.619         |
| Mn22-O42                                    | 1.554         | Mn4-O23                                                     | 1.504         |
| Mn4-O52                                     | 1.558         | Mn5-O26                                                     | 1.547         |
| Mn14-O66                                    | 1.575         | Mn12-O35                                                    | 1.373         |
| Mn20-O68                                    | 1.513         | Mn17-O38                                                    | 1.548         |
| <b>average</b>                              | <b>1.558</b>  | <b>average</b>                                              | <b>1.535</b>  |

**Supplementary Table 17. Crystal orbital Hamilton populations (COHP) of  $\text{Na}_{0.555}\text{MnO}_2$  and  $\text{Na}_{0.500}\text{K}_{0.055}\text{MnO}_2$  at their fully discharged state.**

| Atoms in<br>$\text{NaMnO}_2$ | -COHP<br>(eF) | Atoms in<br>$\text{NaK}_{0.055}\text{MnO}_2$ | -COHP<br>(eF) |
|------------------------------|---------------|----------------------------------------------|---------------|
| Na1-O35                      | 0.275         | K1-O34                                       | 0.159         |
| Na1-O39                      | 0.275         | K1-O35                                       | 0.163         |
| Na1-O43                      | 0.274         | K1-O38                                       | 0.160         |
| Na1-O47                      | 0.274         | K1-O39                                       | 0.163         |
| Na1-O52                      | 0.275         | K1-O43                                       | 0.167         |
| Na1-O56                      | 0.275         | K1-O47                                       | 0.166         |
| <b>average</b>               | <b>0.275</b>  | <b>average</b>                               | <b>0.163</b>  |
| Mn20-O35                     | 1.369         | Mn23-O34                                     | 1.341         |
| Mn17-O39                     | 0.583         | Mn22-O35                                     | 1.481         |
| Mn20-O43                     | 1.370         | Mn25-O38                                     | 1.337         |
| Mn22-O47                     | 1.368         | Mn24-O39                                     | 1.479         |
| Mn28-O52                     | 0.582         | Mn22-O43                                     | 1.434         |
| Mn21-O56                     | 1.368         | Mn24-O47                                     | 1.434         |
| <b>average</b>               | <b>1.107</b>  | <b>average</b>                               | <b>1.418</b>  |

**Supplementary Table 18. Vacancy formation energy in  $\text{Na}_{0.555}\text{MnO}_2$  and  $\text{Na}_{0.500}\text{K}_{0.055}\text{MnO}_2$ .**

| Atoms in<br>$\text{Na}_{0.555}\text{MnO}_2$ | Vacancy formation<br>energy (eV) | Atoms in<br>$\text{Na}_{0.500}\text{K}_{0.055}\text{MnO}_2$ | Vacancy formation<br>energy (eV) |
|---------------------------------------------|----------------------------------|-------------------------------------------------------------|----------------------------------|
| Na1 ( $\text{Na}_e$ )                       | 2.712                            | Na1 ( $\text{Na}_e$ )                                       | -1.841                           |
| Na2 ( $\text{Na}_f$ )                       | 2.787                            | Na2 ( $\text{Na}_f$ )                                       | -3.111                           |
| Na3 ( $\text{Na}_e$ )                       | 3.775                            | Na3 ( $\text{Na}_e$ )                                       | -2.971                           |
| Na4 ( $\text{Na}_f$ )                       | 2.294                            | Na4 ( $\text{Na}_f$ )                                       | -2.911                           |
| Na5 ( $\text{Na}_e$ )                       | 2.674                            | Na5 ( $\text{Na}_e$ )                                       | -3.152                           |
| Na6 ( $\text{Na}_e$ )                       | 2.618                            | Na6 ( $\text{Na}_e$ )                                       | -1.419                           |
| Na7 ( $\text{Na}_e$ )                       | 2.934                            | Na7 ( $\text{Na}_e$ )                                       | -1.982                           |
| Na8 ( $\text{Na}_f$ )                       | 2.738                            | Na8 ( $\text{Na}_f$ )                                       | -3.388                           |
| Na9 ( $\text{Na}_f$ )                       | 2.162                            | Na9 ( $\text{Na}_f$ )                                       | -3.024                           |
| Na10 ( $\text{Na}_e$ )                      | 2.755                            |                                                             |                                  |
| <b>average <math>\text{Na}_e</math></b>     | <b>2.911</b>                     | <b>average <math>\text{Na}_e</math></b>                     | <b>-2.273</b>                    |
| <b>average <math>\text{Na}_f</math></b>     | <b>2.495</b>                     | <b>average <math>\text{Na}_f</math></b>                     | <b>-3.109</b>                    |

**Supplementary Table 19. Diffusion coefficient ( $D_{\text{Na}^+}$ ) from Supplementary Fig. 39.**

|                                                 | $D_{\text{O1}}(\times 10^{-11}$<br>$\text{cm}^2\text{s}^{-1})$ | $D_{\text{O2}}(\times 10^{-11}$<br>$\text{cm}^2\text{s}^{-1})$ | $D_{\text{O3}}(\times 10^{-11}$<br>$\text{cm}^2\text{s}^{-1})$ | $D_{\text{A1}}(\times 10^{-11}$<br>$\text{cm}^2\text{s}^{-1})$ | $D_{\text{A2}}(\times 10^{-11}$<br>$\text{cm}^2\text{s}^{-1})$ |
|-------------------------------------------------|----------------------------------------------------------------|----------------------------------------------------------------|----------------------------------------------------------------|----------------------------------------------------------------|----------------------------------------------------------------|
| $\text{Na}_{0.612}\text{K}_{0.056}\text{MnO}_2$ | 1.952                                                          | 1.411                                                          | 1.465                                                          | 1.561                                                          | 1.538                                                          |
| $\text{Na}_{0.706}\text{MnO}_2$                 | 1.296                                                          | 0.830                                                          | 0.801                                                          | 0.969                                                          | 0.977                                                          |

### Supplementary Methods

Electron paramagnetic resonance (EPR) spectra were obtained using a Bruker electron paramagnetic resonance spectrometer.  $\text{MnCl}_2$  and  $\text{MnO}_2$  after dilution with NaCl were used as standards of  $\text{Mn}^{2+}$  and  $\text{Mn}^{4+}$ . The solubility of  $\text{Mn}^{2+}$  in the electrolytes was analyzed by ultraviolet (UV) spectrum (SPECORD 2010 plus, analytikjena). For UV measurement, the residual electrolyte on the electrodes was washed with dimethyl carbonate (DMC) in an argon-filled glove box. 0.5 and 1.0 mM manganese(II) bis(trifluoromethanesulfonyl)imide ( $\text{Mn}(\text{TFSI})_2$ ) in DMC were used to give the standard  $\text{Mn}^{2+}$  peak. *In situ* differential electrochemical mass spectrometry (DEMS) measurements were carried out using a homemade cell connected to the equipment from Perkin-Elmer (Clarus 680 and SQ 8S).

#### Iodometric titration:

##### 1. Preparation of standard sodium thiosulfate ( $\text{Na}_2\text{S}_2\text{O}_3$ ) aqueous solution

0.1 M of  $\text{Na}_2\text{S}_2\text{O}_3$  aqueous solution is prepared by dissolving 6.25 g of  $\text{Na}_2\text{S}_2\text{O}_3 \cdot 5\text{H}_2\text{O}$  and 5 g of sodium carbonate ( $\text{Na}_2\text{CO}_3$ ) in 250 mL of distilled water. The real concentration of  $\text{Na}_2\text{S}_2\text{O}_3$  aqueous solution was determined by internal standard method with  $\text{K}_2\text{Cr}_2\text{O}_7$  solution.

## **2. Titration of oxygen in the as-synthesized material**

Firstly, 0.1 g of powder sample was dissolved in HCl diluted solution before the iodometric titration under the protection of nitrogen atmosphere. Then, starch solutions and buffered solution were added and the solution changed to dark blue.  $\text{Na}_2\text{S}_2\text{O}_3$  aqueous solution was slowly titrated into the solution till the color disappeared. The oxygen non-stoichiometry was then calculated based on the amount of  $\text{Na}_2\text{S}_2\text{O}_3$  aqueous solution.
